# Supplementary material for: Facile and versatile access to substituted hexabenzoovalene derivatives: characterization and optoelectronic properties
Source: Royal Society of Chemistry journal article supplement (doi:10.1039/c9ob01446b), 2019-01-01
Supplement: c9ob01446b2.pdf [file c9ob01446b2.pdf]

Optimized structures, Z-matrices (in Å) of the ground states and their corresponding total SCF (ESCF) and zero-point (EZP) energies (in Hartree). There are no imaginary frequencies for the intermediates **3**.

**3i**

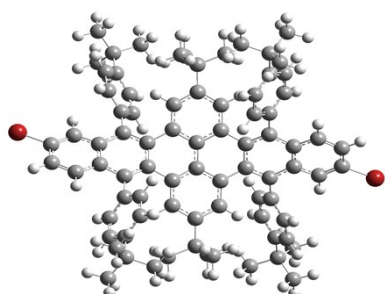

Optimized structure

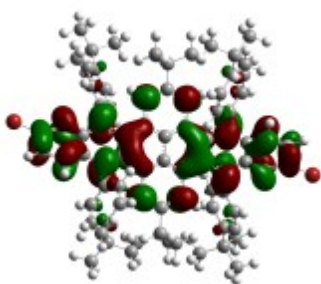

LUMO = -1.66 eV

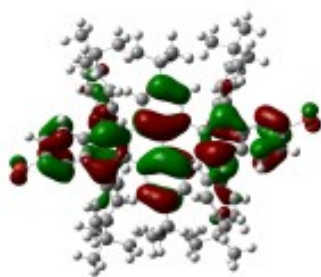

HOMO = -5.19 eV

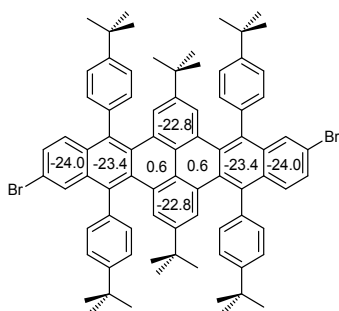

NICS(1)zz

**3a**

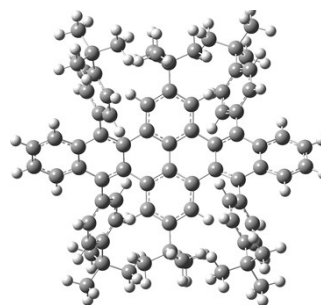

Optimized structure

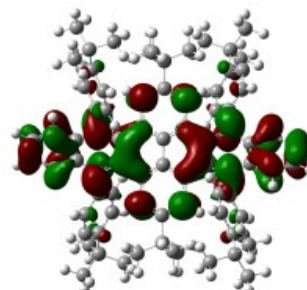

LUMO = -1.42 eV

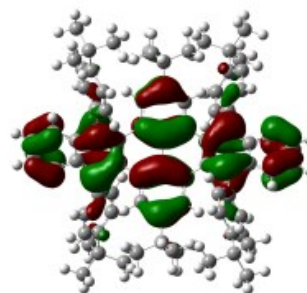

HOMO = -5.00 eV

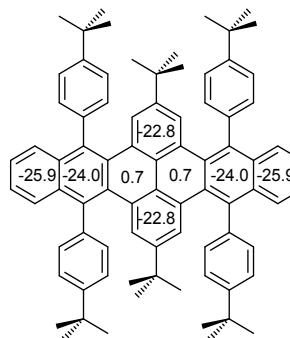

NICS(1)zz

|   |         |         |          |   |        |         |         |
|---|---------|---------|----------|---|--------|---------|---------|
| C | 5.0327  | 5.0898  | 10.5352  | C | 3.8275 | 4.7133  | 11.0781 |
| H | 5.06405 | 5.9083  | 10.04875 | C | 5.0327 | 5.0898  | 10.5352 |
| C | 6.262   | 4.5539  | 11.034   | H | 5.0501 | 5.7014  | 9.8349  |
| C | 6.2043  | 3.6924  | 12.1764  | C | 6.262  | 4.5539  | 11.034  |
| C | 4.9378  | 3.2485  | 12.6422  | C | 6.2043 | 3.6924  | 12.1764 |
| H | 4.8927  | 2.6074  | 13.3157  | C | 4.9378 | 3.2485  | 12.6422 |
| C | 7.4282  | 3.3899  | 12.8594  | H | 4.8927 | 2.6074  | 13.3157 |
| C | 8.6435  | 3.87    | 12.3495  | C | 7.4282 | 3.3899  | 12.8594 |
| C | 8.6879  | 4.3944  | 11.0136  | C | 8.6435 | 3.87    | 12.3495 |
| C | 7.5106  | 4.8498  | 10.4203  | C | 8.6879 | 4.3944  | 11.0136 |
| C | 7.5133  | 5.7589  | 9.2386   | C | 7.5106 | 4.8498  | 10.4203 |
| C | 6.8853  | 5.4499  | 8.0426   | C | 7.5133 | 5.7589  | 9.2386  |
| H | 6.4584  | 4.6295  | 7.9466   | C | 6.8853 | 5.4499  | 8.0426  |
| C | 6.8845  | 6.3508  | 6.9773   | H | 6.4584 | 4.6295  | 7.9466  |
| H | 6.4534  | 6.1206  | 6.1874   | C | 6.8845 | 6.3508  | 6.9773  |
| C | 7.5162  | 7.5871  | 7.0749   | H | 6.4534 | 6.1206  | 6.1874  |
| C | 8.1416  | 7.8961  | 8.2897   | C | 7.5162 | 7.5871  | 7.0749  |
| H | 8.5613  | 8.7214  | 8.3872   | C | 8.1416 | 7.8961  | 8.2897  |
| C | 8.1488  | 7.0002  | 9.3519   | H | 8.5613 | 8.7214  | 8.3872  |
| H | 8.5823  | 7.2287  | 10.1434  | C | 8.1488 | 7.0002  | 9.3519  |
| C | 6.5889  | 9.7818  | 6.3683   | H | 8.5823 | 7.2287  | 10.1434 |
| H | 6.5511  | 10.4312 | 5.6618   | C | 6.5889 | 9.7818  | 6.3683  |
| H | 6.9474  | 10.1928 | 7.1598   | H | 6.5511 | 10.4312 | 5.6618  |
| H | 5.7055  | 9.4546  | 6.5493   | H | 6.9474 | 10.1928 | 7.1598  |
| C | 7.488   | 8.6195  | 5.9466   | H | 5.7055 | 9.4546  | 6.5493  |
| C | 6.946   | 8.054   | 4.6421   | C | 7.488  | 8.6195  | 5.9466  |
| H | 6.83    | 8.7642  | 4.0079   | C | 6.946  | 8.054   | 4.6421  |
| H | 6.1017  | 7.6282  | 4.8042   | H | 6.83   | 8.7642  | 4.0079  |
| H | 7.5655  | 7.4095  | 4.2912   | H | 6.1017 | 7.6282  | 4.8042  |
| C | 8.9036  | 9.1456  | 5.6665   | H | 7.5655 | 7.4095  | 4.2912  |
| H | 9.4739  | 8.414   | 5.4179   | C | 8.9036 | 9.1456  | 5.6665  |
| H | 9.252   | 9.5648  | 6.4564   | H | 9.4739 | 8.414   | 5.4179  |
| H | 8.8747  | 9.7851  | 4.9521   | H | 9.252  | 9.5648  | 6.4564  |
| C | 7.3848  | 2.5498  | 14.0852  | H | 8.8747 | 9.7851  | 4.9521  |
| C | 8.1839  | 1.4089  | 14.1906  | C | 7.3848 | 2.5498  | 14.0852 |
| H | 8.7242  | 1.1623  | 13.4747  | C | 8.1839 | 1.4089  | 14.1906 |

|   |         |         |         |   |         |         |         |
|---|---------|---------|---------|---|---------|---------|---------|
| C | 8.1883  | 0.6412  | 15.3394 | H | 8.7242  | 1.1623  | 13.4747 |
| H | 8.7388  | -0.1085 | 15.3756 | C | 8.1883  | 0.6412  | 15.3394 |
| C | 7.4004  | 0.9502  | 16.444  | H | 8.7388  | -0.1085 | 15.3756 |
| C | 6.6152  | 2.0945  | 16.3528 | C | 7.4004  | 0.9502  | 16.444  |
| H | 6.089   | 2.3443  | 17.0782 | C | 6.6152  | 2.0945  | 16.3528 |
| C | 6.6004  | 2.8737  | 15.204  | H | 6.089   | 2.3443  | 17.0782 |
| H | 6.0593  | 3.63    | 15.1741 | C | 6.6004  | 2.8737  | 15.204  |
| C | 7.3605  | 0.0543  | 17.6809 | H | 6.0593  | 3.63    | 15.1741 |
| C | 8.7078  | -0.5458 | 17.9704 | C | 7.3605  | 0.0543  | 17.6809 |
| H | 9.2686  | 0.1151  | 18.3827 | C | 8.7078  | -0.5458 | 17.9704 |
| H | 9.1087  | -0.8401 | 17.1506 | H | 9.2686  | 0.1151  | 18.3827 |
| H | 8.6025  | -1.2938 | 18.5637 | H | 9.1087  | -0.8401 | 17.1506 |
| C | 6.4419  | -1.1656 | 17.3599 | H | 8.6025  | -1.2938 | 18.5637 |
| H | 6.4456  | -1.7739 | 18.1042 | C | 6.4419  | -1.1656 | 17.3599 |
| H | 6.7696  | -1.6161 | 16.5794 | H | 6.4456  | -1.7739 | 18.1042 |
| H | 5.548   | -0.8598 | 17.2009 | H | 6.7696  | -1.6161 | 16.5794 |
| C | 6.6074  | 0.7151  | 18.8453 | H | 5.548   | -0.8598 | 17.2009 |
| H | 7.1687  | 1.3777  | 19.2545 | C | 6.6074  | 0.7151  | 18.8453 |
| H | 6.3745  | 0.0477  | 19.4952 | H | 7.1687  | 1.3777  | 19.2545 |
| H | 5.8093  | 1.1311  | 18.5149 | H | 6.3745  | 0.0477  | 19.4952 |
| C | 10.0028 | 4.3517  | 10.3243 | H | 5.8093  | 1.1311  | 18.5149 |
| C | 11.1759 | 4.1462  | 11.0797 | C | 10.0028 | 4.3517  | 10.3243 |
| C | 12.4265 | 3.9883  | 10.4392 | C | 11.1759 | 4.1462  | 11.0797 |
| C | 12.4732 | 4.1264  | 9.0497  | C | 12.4265 | 3.9883  | 10.4392 |
| H | 13.2989 | 4.087   | 8.6249  | C | 12.4732 | 4.1264  | 9.0497  |
| C | 11.3343 | 4.3204  | 8.2787  | H | 13.2989 | 4.087   | 8.6249  |
| C | 10.111  | 4.3845  | 8.9286  | C | 11.3343 | 4.3204  | 8.2787  |
| H | 9.3346  | 4.452   | 8.4203  | C | 10.111  | 4.3845  | 8.9286  |
| C | 11.432  | 4.4158  | 6.746   | H | 9.3346  | 4.452   | 8.4203  |
| C | 11.2171 | 3.0135  | 6.2015  | C | 11.432  | 4.4158  | 6.746   |
| H | 12.0675 | 2.5942  | 6.0505  | C | 11.2171 | 3.0135  | 6.2015  |
| H | 10.735  | 3.0611  | 5.3722  | H | 12.0675 | 2.5942  | 6.0505  |
| H | 10.715  | 2.4956  | 6.8357  | H | 10.735  | 3.0611  | 5.3722  |
| C | 12.7193 | 4.863   | 6.2881  | H | 10.715  | 2.4956  | 6.8357  |
| H | 12.8102 | 5.8033  | 6.4564  | C | 12.7193 | 4.863   | 6.2881  |
| H | 12.7974 | 4.6969  | 5.3455  | H | 12.8102 | 5.8033  | 6.4564  |

|   |          |         |          |   |         |         |         |
|---|----------|---------|----------|---|---------|---------|---------|
| H | 13.4088  | 4.3845  | 6.7554   | H | 12.7974 | 4.6969  | 5.3455  |
| C | 10.3702  | 5.2937  | 6.159    | H | 13.4088 | 4.3845  | 6.7554  |
| H | 10.3871  | 6.1502  | 6.5933   | C | 10.3702 | 5.2937  | 6.159   |
| H | 9.5102   | 4.886   | 6.2881   | H | 10.3871 | 6.1502  | 6.5933  |
| H | 10.5306  | 5.4071  | 5.2196   | H | 9.5102  | 4.886   | 6.2881  |
| C | 17.2512  | 5.0898  | 13.0687  | H | 10.5306 | 5.4071  | 5.2196  |
| H | 17.21997 | 5.9083  | 13.55506 | C | 18.4565 | 4.7133  | 12.5258 |
| C | 16.0219  | 4.5539  | 12.5698  | C | 17.2512 | 5.0898  | 13.0687 |
| C | 16.0796  | 3.6924  | 11.4274  | C | 16.0219 | 4.5539  | 12.5698 |
| C | 17.3462  | 3.2485  | 10.9616  | C | 16.0796 | 3.6924  | 11.4274 |
| H | 17.3913  | 2.6074  | 10.2881  | C | 17.3462 | 3.2485  | 10.9616 |
| C | 14.8557  | 3.3899  | 10.7445  | H | 17.3913 | 2.6074  | 10.2881 |
| C | 13.6404  | 3.87    | 11.2543  | C | 14.8557 | 3.3899  | 10.7445 |
| C | 13.5961  | 4.3944  | 12.5903  | C | 13.6404 | 3.87    | 11.2543 |
| C | 14.7733  | 4.8498  | 13.1835  | C | 13.5961 | 4.3944  | 12.5903 |
| C | 14.7707  | 5.7589  | 14.3653  | C | 14.7733 | 4.8498  | 13.1835 |
| C | 15.3987  | 5.4499  | 15.5612  | C | 14.7707 | 5.7589  | 14.3653 |
| H | 15.8256  | 4.6295  | 15.6572  | C | 15.3987 | 5.4499  | 15.5612 |
| C | 15.3994  | 6.3508  | 16.6266  | H | 15.8256 | 4.6295  | 15.6572 |
| H | 15.8306  | 6.1206  | 17.4165  | C | 15.3994 | 6.3508  | 16.6266 |
| C | 14.7677  | 7.5871  | 16.529   | H | 15.8306 | 6.1206  | 17.4165 |
| C | 14.1424  | 7.8961  | 15.3142  | C | 14.7677 | 7.5871  | 16.529  |
| H | 13.7227  | 8.7214  | 15.2166  | C | 14.1424 | 7.8961  | 15.3142 |
| C | 14.1352  | 7.0002  | 14.252   | H | 13.7227 | 8.7214  | 15.2166 |
| H | 13.7017  | 7.2287  | 13.4605  | C | 14.1352 | 7.0002  | 14.252  |
| C | 15.6951  | 9.7818  | 17.2355  | H | 13.7017 | 7.2287  | 13.4605 |
| H | 15.7329  | 10.4312 | 17.9421  | C | 15.6951 | 9.7818  | 17.2355 |
| H | 15.3366  | 10.1928 | 16.444   | H | 15.7329 | 10.4312 | 17.9421 |
| H | 16.5784  | 9.4546  | 17.0546  | H | 15.3366 | 10.1928 | 16.444  |
| C | 14.796   | 8.6195  | 17.6573  | H | 16.5784 | 9.4546  | 17.0546 |
| C | 15.3379  | 8.054   | 18.9618  | C | 14.796  | 8.6195  | 17.6573 |
| H | 15.4539  | 8.7642  | 19.5959  | C | 15.3379 | 8.054   | 18.9618 |
| H | 16.1822  | 7.6282  | 18.7997  | H | 15.4539 | 8.7642  | 19.5959 |
| H | 14.7185  | 7.4095  | 19.3127  | H | 16.1822 | 7.6282  | 18.7997 |
| C | 13.3804  | 9.1456  | 17.9374  | H | 14.7185 | 7.4095  | 19.3127 |
| H | 12.8101  | 8.414   | 18.186   | C | 13.3804 | 9.1456  | 17.9374 |

|   |         |         |         |   |         |         |         |
|---|---------|---------|---------|---|---------|---------|---------|
| H | 13.032  | 9.5648  | 17.1474 | H | 12.8101 | 8.414   | 18.186  |
| H | 13.4093 | 9.7851  | 18.6518 | H | 13.032  | 9.5648  | 17.1474 |
| C | 14.8992 | 2.5498  | 9.5187  | H | 13.4093 | 9.7851  | 18.6518 |
| C | 14.1001 | 1.4089  | 9.4132  | C | 14.8992 | 2.5498  | 9.5187  |
| H | 13.5598 | 1.1623  | 10.1292 | C | 14.1001 | 1.4089  | 9.4132  |
| C | 14.0956 | 0.6412  | 8.2645  | H | 13.5598 | 1.1623  | 10.1292 |
| H | 13.5451 | -0.1085 | 8.2283  | C | 14.0956 | 0.6412  | 8.2645  |
| C | 14.8836 | 0.9502  | 7.1598  | H | 13.5451 | -0.1085 | 8.2283  |
| C | 15.6688 | 2.0945  | 7.2511  | C | 14.8836 | 0.9502  | 7.1598  |
| H | 16.195  | 2.3443  | 6.5257  | C | 15.6688 | 2.0945  | 7.2511  |
| C | 15.6836 | 2.8737  | 8.3998  | H | 16.195  | 2.3443  | 6.5257  |
| H | 16.2247 | 3.63    | 8.4297  | C | 15.6836 | 2.8737  | 8.3998  |
| C | 14.9235 | 0.0543  | 5.923   | H | 16.2247 | 3.63    | 8.4297  |
| C | 13.5761 | -0.5458 | 5.6335  | C | 14.9235 | 0.0543  | 5.923   |
| H | 13.0154 | 0.1151  | 5.2212  | C | 13.5761 | -0.5458 | 5.6335  |
| H | 13.1753 | -0.8401 | 6.4533  | H | 13.0154 | 0.1151  | 5.2212  |
| H | 13.6815 | -1.2938 | 5.0402  | H | 13.1753 | -0.8401 | 6.4533  |
| C | 15.842  | -1.1656 | 6.244   | H | 13.6815 | -1.2938 | 5.0402  |
| H | 15.8384 | -1.7739 | 5.4997  | C | 15.842  | -1.1656 | 6.244   |
| H | 15.5143 | -1.6161 | 7.0245  | H | 15.8384 | -1.7739 | 5.4997  |
| H | 16.736  | -0.8598 | 6.4029  | H | 15.5143 | -1.6161 | 7.0245  |
| C | 15.6766 | 0.7151  | 4.7585  | H | 16.736  | -0.8598 | 6.4029  |
| H | 15.1153 | 1.3777  | 4.3494  | C | 15.6766 | 0.7151  | 4.7585  |
| H | 15.9095 | 0.0477  | 4.1086  | H | 15.1153 | 1.3777  | 4.3494  |
| H | 16.4747 | 1.1311  | 5.089   | H | 15.9095 | 0.0477  | 4.1086  |
| C | 12.2812 | 4.3517  | 13.2795 | H | 16.4747 | 1.1311  | 5.089   |
| C | 11.1081 | 4.1462  | 12.5242 | C | 12.2812 | 4.3517  | 13.2795 |
| C | 9.8575  | 3.9883  | 13.1647 | C | 11.1081 | 4.1462  | 12.5242 |
| C | 9.8107  | 4.1264  | 14.5541 | C | 9.8575  | 3.9883  | 13.1647 |
| H | 8.9851  | 4.087   | 14.979  | C | 9.8107  | 4.1264  | 14.5541 |
| C | 10.9497 | 4.3204  | 15.3252 | H | 8.9851  | 4.087   | 14.979  |
| C | 12.173  | 4.3845  | 14.6753 | C | 10.9497 | 4.3204  | 15.3252 |
| H | 12.9493 | 4.452   | 15.1836 | C | 12.173  | 4.3845  | 14.6753 |
| C | 10.852  | 4.4158  | 16.8579 | H | 12.9493 | 4.452   | 15.1836 |
| C | 11.0669 | 3.0135  | 17.4023 | C | 10.852  | 4.4158  | 16.8579 |
| H | 10.2165 | 2.5942  | 17.5534 | C | 11.0669 | 3.0135  | 17.4023 |

|    |          |         |          |   |          |         |          |
|----|----------|---------|----------|---|----------|---------|----------|
| H  | 11.549   | 3.0611  | 18.2316  | H | 10.2165  | 2.5942  | 17.5534  |
| H  | 11.5689  | 2.4956  | 16.7682  | H | 11.549   | 3.0611  | 18.2316  |
| C  | 9.5647   | 4.863   | 17.3158  | H | 11.5689  | 2.4956  | 16.7682  |
| H  | 9.4738   | 5.8033  | 17.1474  | C | 9.5647   | 4.863   | 17.3158  |
| H  | 9.4865   | 4.6969  | 18.2584  | H | 9.4738   | 5.8033  | 17.1474  |
| H  | 8.8752   | 4.3845  | 16.8484  | H | 9.4865   | 4.6969  | 18.2584  |
| C  | 11.9138  | 5.2937  | 17.4448  | H | 8.8752   | 4.3845  | 16.8484  |
| H  | 11.8968  | 6.1502  | 17.0105  | C | 11.9138  | 5.2937  | 17.4448  |
| H  | 12.7738  | 4.886   | 17.3158  | H | 11.8968  | 6.1502  | 17.0105  |
| H  | 11.7534  | 5.4071  | 18.3843  | H | 12.7738  | 4.886   | 17.3158  |
| C  | 3.7752   | 3.7582  | 12.1056  | H | 11.7534  | 5.4071  | 18.3843  |
| H  | 3.25201  | 2.88112 | 11.41781 | C | 3.7752   | 3.7582  | 12.1056  |
| C  | 18.5087  | 3.7582  | 11.4982  | C | 18.5087  | 3.7582  | 11.4982  |
| H  | 19.03108 | 2.87984 | 12.18502 | H | 17.23129 | 5.79358 | 13.87443 |
| Br | 2.6227   | 5.31795 | 10.57168 | H | 19.4561  | 3.42424 | 11.12968 |
| Br | 19.66133 | 5.31786 | 13.03225 | H | 19.36234 | 5.15171 | 12.88932 |
| C  | 3.8275   | 4.7133  | 11.0781  | H | 2.92167  | 5.15177 | 10.71461 |
| C  | 18.4565  | 4.7133  | 12.5258  | H | 2.82779  | 3.42421 | 12.47407 |

E(SCF)=-8240.35804999 a.u.

E(zp)=-8238.985576 a.u.

E(SCF) = -3098.14922207 a.u.

E(zp)=-3096.757062 a.u.

**3d**

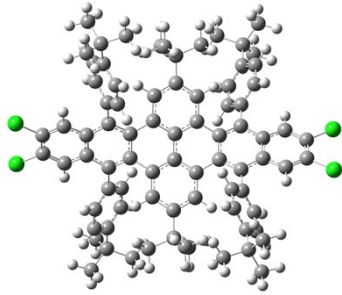

Optimized structure

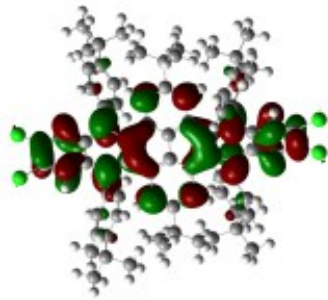

LUMO = -1.83 eV

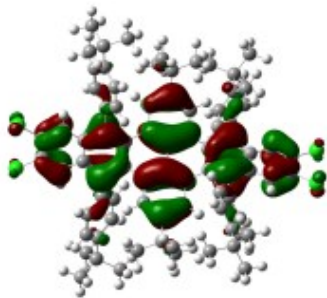

HOMO = -5.34 eV

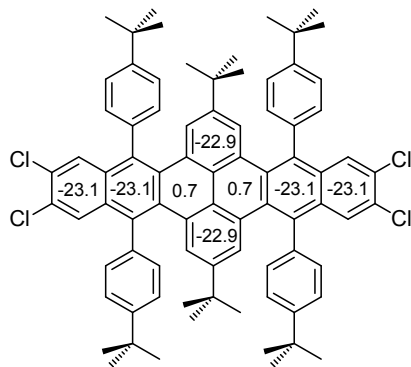

NICS(1)zz

**3e**

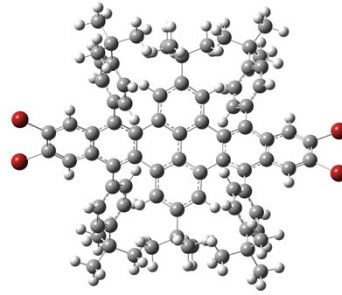

Optimized structure

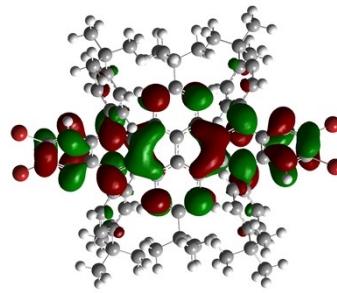

LUMO = -1.83 eV

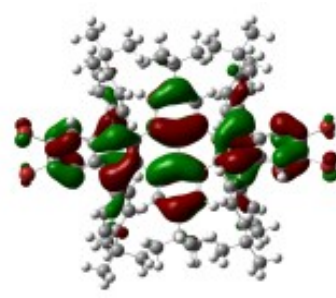

HOMO = -5.32 eV

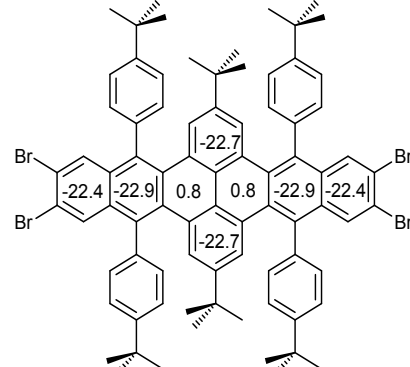

NICS(1)zz

|   |        |         |         |   |        |         |         |
|---|--------|---------|---------|---|--------|---------|---------|
| C | 3.8275 | 4.7133  | 11.0781 | C | 3.8275 | 4.7133  | 11.0781 |
| C | 5.0327 | 5.0898  | 10.5352 | C | 5.0327 | 5.0898  | 10.5352 |
| H | 5.0501 | 5.7014  | 9.8349  | H | 5.0501 | 5.7014  | 9.8349  |
| C | 6.262  | 4.5539  | 11.034  | C | 6.262  | 4.5539  | 11.034  |
| C | 6.2043 | 3.6924  | 12.1764 | C | 6.2043 | 3.6924  | 12.1764 |
| C | 4.9378 | 3.2485  | 12.6422 | C | 4.9378 | 3.2485  | 12.6422 |
| H | 4.8927 | 2.6074  | 13.3157 | H | 4.8927 | 2.6074  | 13.3157 |
| C | 7.4282 | 3.3899  | 12.8594 | C | 7.4282 | 3.3899  | 12.8594 |
| C | 8.6435 | 3.87    | 12.3495 | C | 8.6435 | 3.87    | 12.3495 |
| C | 8.6879 | 4.3944  | 11.0136 | C | 8.6879 | 4.3944  | 11.0136 |
| C | 7.5106 | 4.8498  | 10.4203 | C | 7.5106 | 4.8498  | 10.4203 |
| C | 7.5133 | 5.7589  | 9.2386  | C | 7.5133 | 5.7589  | 9.2386  |
| C | 6.8853 | 5.4499  | 8.0426  | C | 6.8853 | 5.4499  | 8.0426  |
| H | 6.4584 | 4.6295  | 7.9466  | H | 6.4584 | 4.6295  | 7.9466  |
| C | 6.8845 | 6.3508  | 6.9773  | C | 6.8845 | 6.3508  | 6.9773  |
| H | 6.4534 | 6.1206  | 6.1874  | H | 6.4534 | 6.1206  | 6.1874  |
| C | 7.5162 | 7.5871  | 7.0749  | C | 7.5162 | 7.5871  | 7.0749  |
| C | 8.1416 | 7.8961  | 8.2897  | C | 8.1416 | 7.8961  | 8.2897  |
| H | 8.5613 | 8.7214  | 8.3872  | H | 8.5613 | 8.7214  | 8.3872  |
| C | 8.1488 | 7.0002  | 9.3519  | C | 8.1488 | 7.0002  | 9.3519  |
| H | 8.5823 | 7.2287  | 10.1434 | H | 8.5823 | 7.2287  | 10.1434 |
| C | 6.5889 | 9.7818  | 6.3683  | C | 6.5889 | 9.7818  | 6.3683  |
| H | 6.5511 | 10.4312 | 5.6618  | H | 6.5511 | 10.4312 | 5.6618  |
| H | 6.9474 | 10.1928 | 7.1598  | H | 6.9474 | 10.1928 | 7.1598  |
| H | 5.7055 | 9.4546  | 6.5493  | H | 5.7055 | 9.4546  | 6.5493  |
| C | 7.488  | 8.6195  | 5.9466  | C | 7.488  | 8.6195  | 5.9466  |
| C | 6.946  | 8.054   | 4.6421  | C | 6.946  | 8.054   | 4.6421  |
| H | 6.83   | 8.7642  | 4.0079  | H | 6.83   | 8.7642  | 4.0079  |
| H | 6.1017 | 7.6282  | 4.8042  | H | 6.1017 | 7.6282  | 4.8042  |
| H | 7.5655 | 7.4095  | 4.2912  | H | 7.5655 | 7.4095  | 4.2912  |
| C | 8.9036 | 9.1456  | 5.6665  | C | 8.9036 | 9.1456  | 5.6665  |
| H | 9.4739 | 8.414   | 5.4179  | H | 9.4739 | 8.414   | 5.4179  |
| H | 9.252  | 9.5648  | 6.4564  | H | 9.252  | 9.5648  | 6.4564  |
| H | 8.8747 | 9.7851  | 4.9521  | H | 8.8747 | 9.7851  | 4.9521  |
| C | 7.3848 | 2.5498  | 14.0852 | C | 7.3848 | 2.5498  | 14.0852 |
| C | 8.1839 | 1.4089  | 14.1906 | C | 8.1839 | 1.4089  | 14.1906 |



|   |         |         |         |   |         |         |         |
|---|---------|---------|---------|---|---------|---------|---------|
| H | 8.7242  | 1.1623  | 13.4747 | H | 8.7242  | 1.1623  | 13.4747 |
| C | 8.1883  | 0.6412  | 15.3394 | C | 8.1883  | 0.6412  | 15.3394 |
| H | 8.7388  | -0.1085 | 15.3756 | H | 8.7388  | -0.1085 | 15.3756 |
| C | 7.4004  | 0.9502  | 16.444  | C | 7.4004  | 0.9502  | 16.444  |
| C | 6.6152  | 2.0945  | 16.3528 | C | 6.6152  | 2.0945  | 16.3528 |
| H | 6.089   | 2.3443  | 17.0782 | H | 6.089   | 2.3443  | 17.0782 |
| C | 6.6004  | 2.8737  | 15.204  | C | 6.6004  | 2.8737  | 15.204  |
| H | 6.0593  | 3.63    | 15.1741 | H | 6.0593  | 3.63    | 15.1741 |
| C | 7.3605  | 0.0543  | 17.6809 | C | 7.3605  | 0.0543  | 17.6809 |
| C | 8.7078  | -0.5458 | 17.9704 | C | 8.7078  | -0.5458 | 17.9704 |
| H | 9.2686  | 0.1151  | 18.3827 | H | 9.2686  | 0.1151  | 18.3827 |
| H | 9.1087  | -0.8401 | 17.1506 | H | 9.1087  | -0.8401 | 17.1506 |
| H | 8.6025  | -1.2938 | 18.5637 | H | 8.6025  | -1.2938 | 18.5637 |
| C | 6.4419  | -1.1656 | 17.3599 | C | 6.4419  | -1.1656 | 17.3599 |
| H | 6.4456  | -1.7739 | 18.1042 | H | 6.4456  | -1.7739 | 18.1042 |
| H | 6.7696  | -1.6161 | 16.5794 | H | 6.7696  | -1.6161 | 16.5794 |
| H | 5.548   | -0.8598 | 17.2009 | H | 5.548   | -0.8598 | 17.2009 |
| C | 6.6074  | 0.7151  | 18.8453 | C | 6.6074  | 0.7151  | 18.8453 |
| H | 7.1687  | 1.3777  | 19.2545 | H | 7.1687  | 1.3777  | 19.2545 |
| H | 6.3745  | 0.0477  | 19.4952 | H | 6.3745  | 0.0477  | 19.4952 |
| H | 5.8093  | 1.1311  | 18.5149 | H | 5.8093  | 1.1311  | 18.5149 |
| C | 10.0028 | 4.3517  | 10.3243 | C | 10.0028 | 4.3517  | 10.3243 |
| C | 11.1759 | 4.1462  | 11.0797 | C | 11.1759 | 4.1462  | 11.0797 |
| C | 12.4265 | 3.9883  | 10.4392 | C | 12.4265 | 3.9883  | 10.4392 |
| C | 12.4732 | 4.1264  | 9.0497  | C | 12.4732 | 4.1264  | 9.0497  |
| H | 13.2989 | 4.087   | 8.6249  | H | 13.2989 | 4.087   | 8.6249  |
| C | 11.3343 | 4.3204  | 8.2787  | C | 11.3343 | 4.3204  | 8.2787  |
| C | 10.111  | 4.3845  | 8.9286  | C | 10.111  | 4.3845  | 8.9286  |
| H | 9.3346  | 4.452   | 8.4203  | H | 9.3346  | 4.452   | 8.4203  |
| C | 11.432  | 4.4158  | 6.746   | C | 11.432  | 4.4158  | 6.746   |
| C | 11.2171 | 3.0135  | 6.2015  | C | 11.2171 | 3.0135  | 6.2015  |
| H | 12.0675 | 2.5942  | 6.0505  | H | 12.0675 | 2.5942  | 6.0505  |
| H | 10.735  | 3.0611  | 5.3722  | H | 10.735  | 3.0611  | 5.3722  |
| H | 10.715  | 2.4956  | 6.8357  | H | 10.715  | 2.4956  | 6.8357  |
| C | 12.7193 | 4.863   | 6.2881  | C | 12.7193 | 4.863   | 6.2881  |
| H | 12.8102 | 5.8033  | 6.4564  | H | 12.8102 | 5.8033  | 6.4564  |

|   |         |         |         |   |         |         |         |
|---|---------|---------|---------|---|---------|---------|---------|
| H | 12.7974 | 4.6969  | 5.3455  | H | 12.7974 | 4.6969  | 5.3455  |
| H | 13.4088 | 4.3845  | 6.7554  | H | 13.4088 | 4.3845  | 6.7554  |
| C | 10.3702 | 5.2937  | 6.159   | C | 10.3702 | 5.2937  | 6.159   |
| H | 10.3871 | 6.1502  | 6.5933  | H | 10.3871 | 6.1502  | 6.5933  |
| H | 9.5102  | 4.886   | 6.2881  | H | 9.5102  | 4.886   | 6.2881  |
| H | 10.5306 | 5.4071  | 5.2196  | H | 10.5306 | 5.4071  | 5.2196  |
| C | 18.4565 | 4.7133  | 12.5258 | C | 18.4565 | 4.7133  | 12.5258 |
| C | 17.2512 | 5.0898  | 13.0687 | C | 17.2512 | 5.0898  | 13.0687 |
| C | 16.0219 | 4.5539  | 12.5698 | C | 16.0219 | 4.5539  | 12.5698 |
| C | 16.0796 | 3.6924  | 11.4274 | C | 16.0796 | 3.6924  | 11.4274 |
| C | 17.3462 | 3.2485  | 10.9616 | C | 17.3462 | 3.2485  | 10.9616 |
| H | 17.3913 | 2.6074  | 10.2881 | H | 17.3913 | 2.6074  | 10.2881 |
| C | 14.8557 | 3.3899  | 10.7445 | C | 14.8557 | 3.3899  | 10.7445 |
| C | 13.6404 | 3.87    | 11.2543 | C | 13.6404 | 3.87    | 11.2543 |
| C | 13.5961 | 4.3944  | 12.5903 | C | 13.5961 | 4.3944  | 12.5903 |
| C | 14.7733 | 4.8498  | 13.1835 | C | 14.7733 | 4.8498  | 13.1835 |
| C | 14.7707 | 5.7589  | 14.3653 | C | 14.7707 | 5.7589  | 14.3653 |
| C | 15.3987 | 5.4499  | 15.5612 | C | 15.3987 | 5.4499  | 15.5612 |
| H | 15.8256 | 4.6295  | 15.6572 | H | 15.8256 | 4.6295  | 15.6572 |
| C | 15.3994 | 6.3508  | 16.6266 | C | 15.3994 | 6.3508  | 16.6266 |
| H | 15.8306 | 6.1206  | 17.4165 | H | 15.8306 | 6.1206  | 17.4165 |
| C | 14.7677 | 7.5871  | 16.529  | C | 14.7677 | 7.5871  | 16.529  |
| C | 14.1424 | 7.8961  | 15.3142 | C | 14.1424 | 7.8961  | 15.3142 |
| H | 13.7227 | 8.7214  | 15.2166 | H | 13.7227 | 8.7214  | 15.2166 |
| C | 14.1352 | 7.0002  | 14.252  | C | 14.1352 | 7.0002  | 14.252  |
| H | 13.7017 | 7.2287  | 13.4605 | H | 13.7017 | 7.2287  | 13.4605 |
| C | 15.6951 | 9.7818  | 17.2355 | C | 15.6951 | 9.7818  | 17.2355 |
| H | 15.7329 | 10.4312 | 17.9421 | H | 15.7329 | 10.4312 | 17.9421 |
| H | 15.3366 | 10.1928 | 16.444  | H | 15.3366 | 10.1928 | 16.444  |
| H | 16.5784 | 9.4546  | 17.0546 | H | 16.5784 | 9.4546  | 17.0546 |
| C | 14.796  | 8.6195  | 17.6573 | C | 14.796  | 8.6195  | 17.6573 |
| C | 15.3379 | 8.054   | 18.9618 | C | 15.3379 | 8.054   | 18.9618 |
| H | 15.4539 | 8.7642  | 19.5959 | H | 15.4539 | 8.7642  | 19.5959 |
| H | 16.1822 | 7.6282  | 18.7997 | H | 16.1822 | 7.6282  | 18.7997 |
| H | 14.7185 | 7.4095  | 19.3127 | H | 14.7185 | 7.4095  | 19.3127 |
| C | 13.3804 | 9.1456  | 17.9374 | C | 13.3804 | 9.1456  | 17.9374 |

|   |         |         |         |   |         |         |         |
|---|---------|---------|---------|---|---------|---------|---------|
| H | 12.8101 | 8.414   | 18.186  | H | 12.8101 | 8.414   | 18.186  |
| H | 13.032  | 9.5648  | 17.1474 | H | 13.032  | 9.5648  | 17.1474 |
| H | 13.4093 | 9.7851  | 18.6518 | H | 13.4093 | 9.7851  | 18.6518 |
| C | 14.8992 | 2.5498  | 9.5187  | C | 14.8992 | 2.5498  | 9.5187  |
| C | 14.1001 | 1.4089  | 9.4132  | C | 14.1001 | 1.4089  | 9.4132  |
| H | 13.5598 | 1.1623  | 10.1292 | H | 13.5598 | 1.1623  | 10.1292 |
| C | 14.0956 | 0.6412  | 8.2645  | C | 14.0956 | 0.6412  | 8.2645  |
| H | 13.5451 | -0.1085 | 8.2283  | H | 13.5451 | -0.1085 | 8.2283  |
| C | 14.8836 | 0.9502  | 7.1598  | C | 14.8836 | 0.9502  | 7.1598  |
| C | 15.6688 | 2.0945  | 7.2511  | C | 15.6688 | 2.0945  | 7.2511  |
| H | 16.195  | 2.3443  | 6.5257  | H | 16.195  | 2.3443  | 6.5257  |
| C | 15.6836 | 2.8737  | 8.3998  | C | 15.6836 | 2.8737  | 8.3998  |
| H | 16.2247 | 3.63    | 8.4297  | H | 16.2247 | 3.63    | 8.4297  |
| C | 14.9235 | 0.0543  | 5.923   | C | 14.9235 | 0.0543  | 5.923   |
| C | 13.5761 | -0.5458 | 5.6335  | C | 13.5761 | -0.5458 | 5.6335  |
| H | 13.0154 | 0.1151  | 5.2212  | H | 13.0154 | 0.1151  | 5.2212  |
| H | 13.1753 | -0.8401 | 6.4533  | H | 13.1753 | -0.8401 | 6.4533  |
| H | 13.6815 | -1.2938 | 5.0402  | H | 13.6815 | -1.2938 | 5.0402  |
| C | 15.842  | -1.1656 | 6.244   | C | 15.842  | -1.1656 | 6.244   |
| H | 15.8384 | -1.7739 | 5.4997  | H | 15.8384 | -1.7739 | 5.4997  |
| H | 15.5143 | -1.6161 | 7.0245  | H | 15.5143 | -1.6161 | 7.0245  |
| H | 16.736  | -0.8598 | 6.4029  | H | 16.736  | -0.8598 | 6.4029  |
| C | 15.6766 | 0.7151  | 4.7585  | C | 15.6766 | 0.7151  | 4.7585  |
| H | 15.1153 | 1.3777  | 4.3494  | H | 15.1153 | 1.3777  | 4.3494  |
| H | 15.9095 | 0.0477  | 4.1086  | H | 15.9095 | 0.0477  | 4.1086  |
| H | 16.4747 | 1.1311  | 5.089   | H | 16.4747 | 1.1311  | 5.089   |
| C | 12.2812 | 4.3517  | 13.2795 | C | 12.2812 | 4.3517  | 13.2795 |
| C | 11.1081 | 4.1462  | 12.5242 | C | 11.1081 | 4.1462  | 12.5242 |
| C | 9.8575  | 3.9883  | 13.1647 | C | 9.8575  | 3.9883  | 13.1647 |
| C | 9.8107  | 4.1264  | 14.5541 | C | 9.8107  | 4.1264  | 14.5541 |
| H | 8.9851  | 4.087   | 14.979  | H | 8.9851  | 4.087   | 14.979  |
| C | 10.9497 | 4.3204  | 15.3252 | C | 10.9497 | 4.3204  | 15.3252 |
| C | 12.173  | 4.3845  | 14.6753 | C | 12.173  | 4.3845  | 14.6753 |
| H | 12.9493 | 4.452   | 15.1836 | H | 12.9493 | 4.452   | 15.1836 |
| C | 10.852  | 4.4158  | 16.8579 | C | 10.852  | 4.4158  | 16.8579 |
| C | 11.0669 | 3.0135  | 17.4023 | C | 11.0669 | 3.0135  | 17.4023 |

|                            |          |         |          |                             |          |         |          |
|----------------------------|----------|---------|----------|-----------------------------|----------|---------|----------|
| H                          | 10.2165  | 2.5942  | 17.5534  | H                           | 10.2165  | 2.5942  | 17.5534  |
| H                          | 11.549   | 3.0611  | 18.2316  | H                           | 11.549   | 3.0611  | 18.2316  |
| H                          | 11.5689  | 2.4956  | 16.7682  | H                           | 11.5689  | 2.4956  | 16.7682  |
| C                          | 9.5647   | 4.863   | 17.3158  | C                           | 9.5647   | 4.863   | 17.3158  |
| H                          | 9.4738   | 5.8033  | 17.1474  | H                           | 9.4738   | 5.8033  | 17.1474  |
| H                          | 9.4865   | 4.6969  | 18.2584  | H                           | 9.4865   | 4.6969  | 18.2584  |
| H                          | 8.8752   | 4.3845  | 16.8484  | H                           | 8.8752   | 4.3845  | 16.8484  |
| C                          | 11.9138  | 5.2937  | 17.4448  | C                           | 11.9138  | 5.2937  | 17.4448  |
| H                          | 11.8968  | 6.1502  | 17.0105  | H                           | 11.8968  | 6.1502  | 17.0105  |
| H                          | 12.7738  | 4.886   | 17.3158  | H                           | 12.7738  | 4.886   | 17.3158  |
| H                          | 11.7534  | 5.4071  | 18.3843  | H                           | 11.7534  | 5.4071  | 18.3843  |
| C                          | 3.7752   | 3.7582  | 12.1056  | C                           | 3.7752   | 3.7582  | 12.1056  |
| C                          | 18.5087  | 3.7582  | 11.4982  | C                           | 18.5087  | 3.7582  | 11.4982  |
| Cl                         | 20.00467 | 5.47921 | 12.86366 | H                           | 17.23129 | 5.79358 | 13.87443 |
| Cl                         | 2.80864  | 2.46499 | 11.4049  | Br                          | 2.72627  | 2.35478 | 11.34518 |
| Cl                         | 2.27933  | 5.47921 | 10.74024 | Br                          | 2.14738  | 5.54449 | 10.71145 |
| Cl                         | 19.47393 | 2.46305 | 12.19714 | Br                          | 19.5562  | 2.35267 | 12.25671 |
| H                          | 17.23129 | 5.79358 | 13.87443 | Br                          | 20.13662 | 5.54449 | 12.89245 |
| E(SCF)=-4936.51891882 a.u. |          |         |          | E(SCF)=-13382.55816870 a.u. |          |         |          |
| E(zp)=-4935.16615 a.u.     |          |         |          | E(zp)=-13381.206437 a.u.    |          |         |          |

**3k**

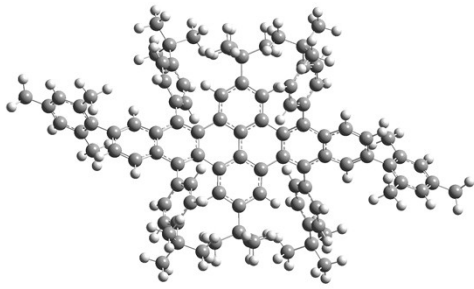

Optimized structure

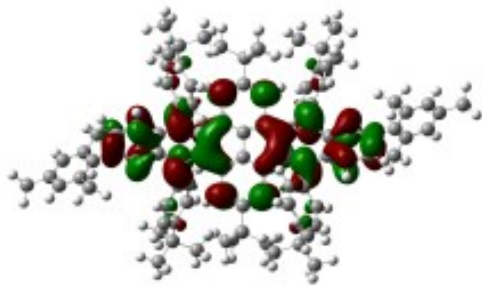

LUMO = -1.45 eV

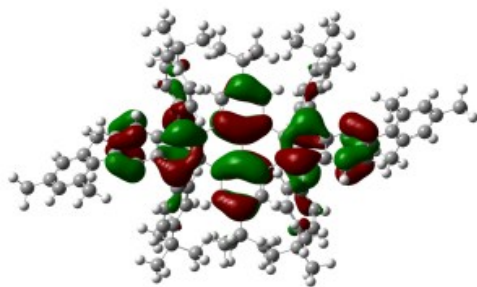

HOMO = -5.01 eV

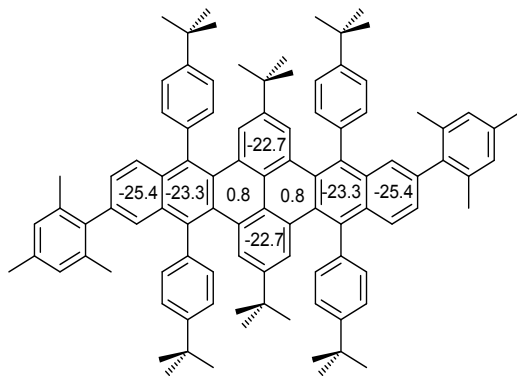

NICS(1)zz

**3f**

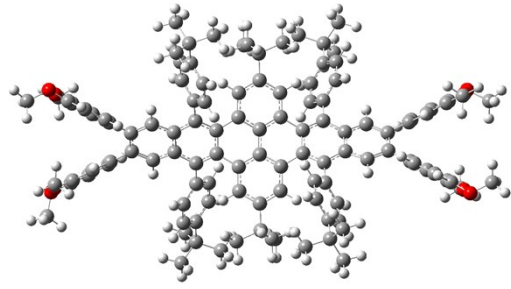

Optimized structure

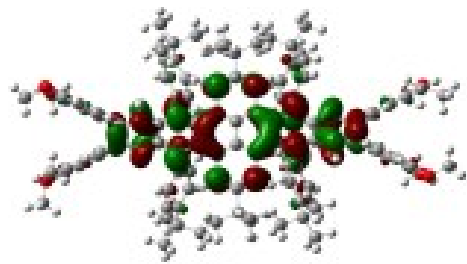

LUMO = -1.51 eV

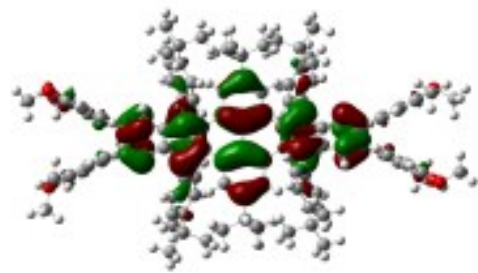

HOMO = -4.97 eV

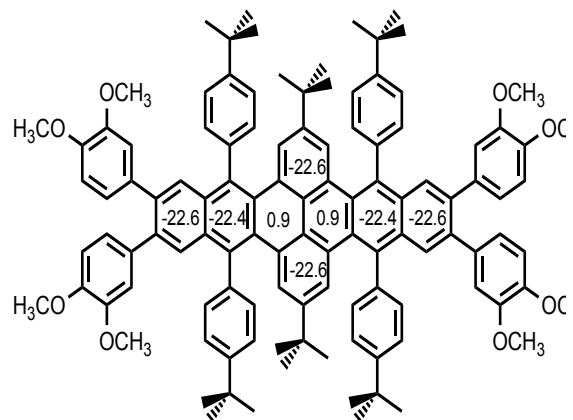

NICS(1)zz

|   |         |         |          |   |         |         |          |
|---|---------|---------|----------|---|---------|---------|----------|
| C | 5.0327  | 5.0898  | 10.5352  | C | 5.0327  | 5.0898  | 10.5352  |
| H | 5.05366 | 6.08701 | 10.28685 | H | 5.06405 | 5.9083  | 10.04875 |
| C | 6.262   | 4.5539  | 11.034   | C | 6.262   | 4.5539  | 11.034   |
| C | 6.2043  | 3.6924  | 12.1764  | C | 6.2043  | 3.6924  | 12.1764  |
| C | 4.9378  | 3.2485  | 12.6422  | C | 4.9378  | 3.2485  | 12.6422  |
| H | 4.8927  | 2.6074  | 13.3157  | H | 4.8927  | 2.6074  | 13.3157  |
| C | 7.4282  | 3.3899  | 12.8594  | C | 7.4282  | 3.3899  | 12.8594  |
| C | 8.6435  | 3.87    | 12.3495  | C | 8.6435  | 3.87    | 12.3495  |
| C | 8.6879  | 4.3944  | 11.0136  | C | 8.6879  | 4.3944  | 11.0136  |
| C | 7.5106  | 4.8498  | 10.4203  | C | 7.5106  | 4.8498  | 10.4203  |
| C | 7.5133  | 5.7589  | 9.2386   | C | 7.5133  | 5.7589  | 9.2386   |
| C | 6.8853  | 5.4499  | 8.0426   | C | 6.8853  | 5.4499  | 8.0426   |
| H | 6.4584  | 4.6295  | 7.9466   | H | 6.4584  | 4.6295  | 7.9466   |
| C | 6.8845  | 6.3508  | 6.9773   | C | 6.8845  | 6.3508  | 6.9773   |
| H | 6.4534  | 6.1206  | 6.1874   | H | 6.4534  | 6.1206  | 6.1874   |
| C | 7.5162  | 7.5871  | 7.0749   | C | 7.5162  | 7.5871  | 7.0749   |
| C | 8.1416  | 7.8961  | 8.2897   | C | 8.1416  | 7.8961  | 8.2897   |
| H | 8.5613  | 8.7214  | 8.3872   | H | 8.5613  | 8.7214  | 8.3872   |
| C | 8.1488  | 7.0002  | 9.3519   | C | 8.1488  | 7.0002  | 9.3519   |
| H | 8.5823  | 7.2287  | 10.1434  | H | 8.5823  | 7.2287  | 10.1434  |
| C | 6.5889  | 9.7818  | 6.3683   | C | 6.5889  | 9.7818  | 6.3683   |
| H | 6.5511  | 10.4312 | 5.6618   | H | 6.5511  | 10.4312 | 5.6618   |
| H | 6.9474  | 10.1928 | 7.1598   | H | 6.9474  | 10.1928 | 7.1598   |
| H | 5.7055  | 9.4546  | 6.5493   | H | 5.7055  | 9.4546  | 6.5493   |
| C | 7.488   | 8.6195  | 5.9466   | C | 7.488   | 8.6195  | 5.9466   |
| C | 6.946   | 8.054   | 4.6421   | C | 6.946   | 8.054   | 4.6421   |
| H | 6.83    | 8.7642  | 4.0079   | H | 6.83    | 8.7642  | 4.0079   |
| H | 6.1017  | 7.6282  | 4.8042   | H | 6.1017  | 7.6282  | 4.8042   |
| H | 7.5655  | 7.4095  | 4.2912   | H | 7.5655  | 7.4095  | 4.2912   |
| C | 8.9036  | 9.1456  | 5.6665   | C | 8.9036  | 9.1456  | 5.6665   |
| H | 9.4739  | 8.414   | 5.4179   | H | 9.4739  | 8.414   | 5.4179   |
| H | 9.252   | 9.5648  | 6.4564   | H | 9.252   | 9.5648  | 6.4564   |
| H | 8.8747  | 9.7851  | 4.9521   | H | 8.8747  | 9.7851  | 4.9521   |
| C | 7.3848  | 2.5498  | 14.0852  | C | 7.3848  | 2.5498  | 14.0852  |
| C | 8.1839  | 1.4089  | 14.1906  | C | 8.1839  | 1.4089  | 14.1906  |
| H | 8.7242  | 1.1623  | 13.4747  | H | 8.7242  | 1.1623  | 13.4747  |

|   |         |         |         |   |         |         |         |
|---|---------|---------|---------|---|---------|---------|---------|
| C | 8.1883  | 0.6412  | 15.3394 | C | 8.1883  | 0.6412  | 15.3394 |
| H | 8.7388  | -0.1085 | 15.3756 | H | 8.7388  | -0.1085 | 15.3756 |
| C | 7.4004  | 0.9502  | 16.444  | C | 7.4004  | 0.9502  | 16.444  |
| C | 6.6152  | 2.0945  | 16.3528 | C | 6.6152  | 2.0945  | 16.3528 |
| H | 6.089   | 2.3443  | 17.0782 | H | 6.089   | 2.3443  | 17.0782 |
| C | 6.6004  | 2.8737  | 15.204  | C | 6.6004  | 2.8737  | 15.204  |
| H | 6.0593  | 3.63    | 15.1741 | H | 6.0593  | 3.63    | 15.1741 |
| C | 7.3605  | 0.0543  | 17.6809 | C | 7.3605  | 0.0543  | 17.6809 |
| C | 8.7078  | -0.5458 | 17.9704 | C | 8.7078  | -0.5458 | 17.9704 |
| H | 9.2686  | 0.1151  | 18.3827 | H | 9.2686  | 0.1151  | 18.3827 |
| H | 9.1087  | -0.8401 | 17.1506 | H | 9.1087  | -0.8401 | 17.1506 |
| H | 8.6025  | -1.2938 | 18.5637 | H | 8.6025  | -1.2938 | 18.5637 |
| C | 6.4419  | -1.1656 | 17.3599 | C | 6.4419  | -1.1656 | 17.3599 |
| H | 6.4456  | -1.7739 | 18.1042 | H | 6.4456  | -1.7739 | 18.1042 |
| H | 6.7696  | -1.6161 | 16.5794 | H | 6.7696  | -1.6161 | 16.5794 |
| H | 5.548   | -0.8598 | 17.2009 | H | 5.548   | -0.8598 | 17.2009 |
| C | 6.6074  | 0.7151  | 18.8453 | C | 6.6074  | 0.7151  | 18.8453 |
| H | 7.1687  | 1.3777  | 19.2545 | H | 7.1687  | 1.3777  | 19.2545 |
| H | 6.3745  | 0.0477  | 19.4952 | H | 6.3745  | 0.0477  | 19.4952 |
| H | 5.8093  | 1.1311  | 18.5149 | H | 5.8093  | 1.1311  | 18.5149 |
| C | 10.0028 | 4.3517  | 10.3243 | C | 10.0028 | 4.3517  | 10.3243 |
| C | 11.1759 | 4.1462  | 11.0797 | C | 11.1759 | 4.1462  | 11.0797 |
| C | 12.4265 | 3.9883  | 10.4392 | C | 12.4265 | 3.9883  | 10.4392 |
| C | 12.4732 | 4.1264  | 9.0497  | C | 12.4732 | 4.1264  | 9.0497  |
| H | 13.2989 | 4.087   | 8.6249  | H | 13.2989 | 4.087   | 8.6249  |
| C | 11.3343 | 4.3204  | 8.2787  | C | 11.3343 | 4.3204  | 8.2787  |
| C | 10.111  | 4.3845  | 8.9286  | C | 10.111  | 4.3845  | 8.9286  |
| H | 9.3346  | 4.452   | 8.4203  | H | 9.3346  | 4.452   | 8.4203  |
| C | 11.432  | 4.4158  | 6.746   | C | 11.432  | 4.4158  | 6.746   |
| C | 11.2171 | 3.0135  | 6.2015  | C | 11.2171 | 3.0135  | 6.2015  |
| H | 12.0675 | 2.5942  | 6.0505  | H | 12.0675 | 2.5942  | 6.0505  |
| H | 10.735  | 3.0611  | 5.3722  | H | 10.735  | 3.0611  | 5.3722  |
| H | 10.715  | 2.4956  | 6.8357  | H | 10.715  | 2.4956  | 6.8357  |
| C | 12.7193 | 4.863   | 6.2881  | C | 12.7193 | 4.863   | 6.2881  |
| H | 12.8102 | 5.8033  | 6.4564  | H | 12.8102 | 5.8033  | 6.4564  |
| H | 12.7974 | 4.6969  | 5.3455  | H | 12.7974 | 4.6969  | 5.3455  |

|   |          |         |          |   |          |         |          |
|---|----------|---------|----------|---|----------|---------|----------|
| H | 13.4088  | 4.3845  | 6.7554   | H | 13.4088  | 4.3845  | 6.7554   |
| C | 10.3702  | 5.2937  | 6.159    | C | 10.3702  | 5.2937  | 6.159    |
| H | 10.3871  | 6.1502  | 6.5933   | H | 10.3871  | 6.1502  | 6.5933   |
| H | 9.5102   | 4.886   | 6.2881   | H | 9.5102   | 4.886   | 6.2881   |
| H | 10.5306  | 5.4071  | 5.2196   | H | 10.5306  | 5.4071  | 5.2196   |
| C | 17.2512  | 5.0898  | 13.0687  | C | 17.2512  | 5.0898  | 13.0687  |
| H | 17.23038 | 6.087   | 13.31697 | H | 17.21997 | 5.9083  | 13.55506 |
| C | 16.0219  | 4.5539  | 12.5698  | C | 16.0219  | 4.5539  | 12.5698  |
| C | 16.0796  | 3.6924  | 11.4274  | C | 16.0796  | 3.6924  | 11.4274  |
| C | 17.3462  | 3.2485  | 10.9616  | C | 17.3462  | 3.2485  | 10.9616  |
| H | 17.3913  | 2.6074  | 10.2881  | H | 17.3913  | 2.6074  | 10.2881  |
| C | 14.8557  | 3.3899  | 10.7445  | C | 14.8557  | 3.3899  | 10.7445  |
| C | 13.6404  | 3.87    | 11.2543  | C | 13.6404  | 3.87    | 11.2543  |
| C | 13.5961  | 4.3944  | 12.5903  | C | 13.5961  | 4.3944  | 12.5903  |
| C | 14.7733  | 4.8498  | 13.1835  | C | 14.7733  | 4.8498  | 13.1835  |
| C | 14.7707  | 5.7589  | 14.3653  | C | 14.7707  | 5.7589  | 14.3653  |
| C | 15.3987  | 5.4499  | 15.5612  | C | 15.3987  | 5.4499  | 15.5612  |
| H | 15.8256  | 4.6295  | 15.6572  | H | 15.8256  | 4.6295  | 15.6572  |
| C | 15.3994  | 6.3508  | 16.6266  | C | 15.3994  | 6.3508  | 16.6266  |
| H | 15.8306  | 6.1206  | 17.4165  | H | 15.8306  | 6.1206  | 17.4165  |
| C | 14.7677  | 7.5871  | 16.529   | C | 14.7677  | 7.5871  | 16.529   |
| C | 14.1424  | 7.8961  | 15.3142  | C | 14.1424  | 7.8961  | 15.3142  |
| H | 13.7227  | 8.7214  | 15.2166  | H | 13.7227  | 8.7214  | 15.2166  |
| C | 14.1352  | 7.0002  | 14.252   | C | 14.1352  | 7.0002  | 14.252   |
| H | 13.7017  | 7.2287  | 13.4605  | H | 13.7017  | 7.2287  | 13.4605  |
| C | 15.6951  | 9.7818  | 17.2355  | C | 15.6951  | 9.7818  | 17.2355  |
| H | 15.7329  | 10.4312 | 17.9421  | H | 15.7329  | 10.4312 | 17.9421  |
| H | 15.3366  | 10.1928 | 16.444   | H | 15.3366  | 10.1928 | 16.444   |
| H | 16.5784  | 9.4546  | 17.0546  | H | 16.5784  | 9.4546  | 17.0546  |
| C | 14.796   | 8.6195  | 17.6573  | C | 14.796   | 8.6195  | 17.6573  |
| C | 15.3379  | 8.054   | 18.9618  | C | 15.3379  | 8.054   | 18.9618  |
| H | 15.4539  | 8.7642  | 19.5959  | H | 15.4539  | 8.7642  | 19.5959  |
| H | 16.1822  | 7.6282  | 18.7997  | H | 16.1822  | 7.6282  | 18.7997  |
| H | 14.7185  | 7.4095  | 19.3127  | H | 14.7185  | 7.4095  | 19.3127  |
| C | 13.3804  | 9.1456  | 17.9374  | C | 13.3804  | 9.1456  | 17.9374  |
| H | 12.8101  | 8.414   | 18.186   | H | 12.8101  | 8.414   | 18.186   |



|   |         |         |         |   |         |         |         |
|---|---------|---------|---------|---|---------|---------|---------|
| H | 13.032  | 9.5648  | 17.1474 | H | 13.032  | 9.5648  | 17.1474 |
| H | 13.4093 | 9.7851  | 18.6518 | H | 13.4093 | 9.7851  | 18.6518 |
| C | 14.8992 | 2.5498  | 9.5187  | C | 14.8992 | 2.5498  | 9.5187  |
| C | 14.1001 | 1.4089  | 9.4132  | C | 14.1001 | 1.4089  | 9.4132  |
| H | 13.5598 | 1.1623  | 10.1292 | H | 13.5598 | 1.1623  | 10.1292 |
| C | 14.0956 | 0.6412  | 8.2645  | C | 14.0956 | 0.6412  | 8.2645  |
| H | 13.5451 | -0.1085 | 8.2283  | H | 13.5451 | -0.1085 | 8.2283  |
| C | 14.8836 | 0.9502  | 7.1598  | C | 14.8836 | 0.9502  | 7.1598  |
| C | 15.6688 | 2.0945  | 7.2511  | C | 15.6688 | 2.0945  | 7.2511  |
| H | 16.195  | 2.3443  | 6.5257  | H | 16.195  | 2.3443  | 6.5257  |
| C | 15.6836 | 2.8737  | 8.3998  | C | 15.6836 | 2.8737  | 8.3998  |
| H | 16.2247 | 3.63    | 8.4297  | H | 16.2247 | 3.63    | 8.4297  |
| C | 14.9235 | 0.0543  | 5.923   | C | 14.9235 | 0.0543  | 5.923   |
| C | 13.5761 | -0.5458 | 5.6335  | C | 13.5761 | -0.5458 | 5.6335  |
| H | 13.0154 | 0.1151  | 5.2212  | H | 13.0154 | 0.1151  | 5.2212  |
| H | 13.1753 | -0.8401 | 6.4533  | H | 13.1753 | -0.8401 | 6.4533  |
| H | 13.6815 | -1.2938 | 5.0402  | H | 13.6815 | -1.2938 | 5.0402  |
| C | 15.842  | -1.1656 | 6.244   | C | 15.842  | -1.1656 | 6.244   |
| H | 15.8384 | -1.7739 | 5.4997  | H | 15.8384 | -1.7739 | 5.4997  |
| H | 15.5143 | -1.6161 | 7.0245  | H | 15.5143 | -1.6161 | 7.0245  |
| H | 16.736  | -0.8598 | 6.4029  | H | 16.736  | -0.8598 | 6.4029  |
| C | 15.6766 | 0.7151  | 4.7585  | C | 15.6766 | 0.7151  | 4.7585  |
| H | 15.1153 | 1.3777  | 4.3494  | H | 15.1153 | 1.3777  | 4.3494  |
| H | 15.9095 | 0.0477  | 4.1086  | H | 15.9095 | 0.0477  | 4.1086  |
| H | 16.4747 | 1.1311  | 5.089   | H | 16.4747 | 1.1311  | 5.089   |
| C | 12.2812 | 4.3517  | 13.2795 | C | 12.2812 | 4.3517  | 13.2795 |
| C | 11.1081 | 4.1462  | 12.5242 | C | 11.1081 | 4.1462  | 12.5242 |
| C | 9.8575  | 3.9883  | 13.1647 | C | 9.8575  | 3.9883  | 13.1647 |
| C | 9.8107  | 4.1264  | 14.5541 | C | 9.8107  | 4.1264  | 14.5541 |
| H | 8.9851  | 4.087   | 14.979  | H | 8.9851  | 4.087   | 14.979  |
| C | 10.9497 | 4.3204  | 15.3252 | C | 10.9497 | 4.3204  | 15.3252 |
| C | 12.173  | 4.3845  | 14.6753 | C | 12.173  | 4.3845  | 14.6753 |
| H | 12.9493 | 4.452   | 15.1836 | H | 12.9493 | 4.452   | 15.1836 |
| C | 10.852  | 4.4158  | 16.8579 | C | 10.852  | 4.4158  | 16.8579 |
| C | 11.0669 | 3.0135  | 17.4023 | C | 11.0669 | 3.0135  | 17.4023 |
| H | 10.2165 | 2.5942  | 17.5534 | H | 10.2165 | 2.5942  | 17.5534 |

|   |          |         |          |   |          |         |          |
|---|----------|---------|----------|---|----------|---------|----------|
| H | 11.549   | 3.0611  | 18.2316  | H | 11.549   | 3.0611  | 18.2316  |
| H | 11.5689  | 2.4956  | 16.7682  | H | 11.5689  | 2.4956  | 16.7682  |
| C | 9.5647   | 4.863   | 17.3158  | C | 9.5647   | 4.863   | 17.3158  |
| H | 9.4738   | 5.8033  | 17.1474  | H | 9.4738   | 5.8033  | 17.1474  |
| H | 9.4865   | 4.6969  | 18.2584  | H | 9.4865   | 4.6969  | 18.2584  |
| H | 8.8752   | 4.3845  | 16.8484  | H | 8.8752   | 4.3845  | 16.8484  |
| C | 11.9138  | 5.2937  | 17.4448  | C | 11.9138  | 5.2937  | 17.4448  |
| H | 11.8968  | 6.1502  | 17.0105  | H | 11.8968  | 6.1502  | 17.0105  |
| H | 12.7738  | 4.886   | 17.3158  | H | 12.7738  | 4.886   | 17.3158  |
| H | 11.7534  | 5.4071  | 18.3843  | H | 11.7534  | 5.4071  | 18.3843  |
| C | 3.7752   | 3.7582  | 12.1056  | C | 2.9075   | 5.17502 | 10.69139 |
| H | 3.33684  | 2.82721 | 11.15163 | C | 2.20992  | 4.57054 | 9.64567  |
| C | 18.5087  | 3.7582  | 11.4982  | C | 2.43769  | 6.3653  | 11.2472  |
| H | 18.94624 | 2.82585 | 12.4513  | H | 2.57996  | 3.63222 | 9.20777  |
| C | 2.9075   | 5.17502 | 10.69139 | C | 1.27085  | 6.95134 | 10.75671 |
| C | 2.46234  | 4.87174 | 9.40477  | H | 2.98769  | 6.84146 | 12.07197 |
| C | 2.18518  | 6.06386 | 11.48803 | H | 0.72478  | 7.70461 | 11.39058 |
| C | 1.2949   | 5.4575  | 8.91441  | C | 2.80992  | 3.40431 | 12.49564 |
| C | 1.01827  | 6.64988 | 10.99768 | C | 2.17704  | 2.31109 | 11.90412 |
| C | 0.57322  | 6.34684 | 9.71031  | C | 2.21849  | 4.04859 | 13.58262 |
| H | 0.94463  | 5.21878 | 7.89973  | C | 0.95243  | 1.86212 | 12.3993  |
| H | 0.44906  | 7.35108 | 11.62506 | H | 2.64329  | 1.80304 | 11.0476  |
| C | 3.84434  | 4.71856 | 11.07051 | H | 2.71791  | 4.91026 | 14.04906 |
| C | 3.25933  | 3.89026 | 8.5255   | H | 0.30014  | 1.21598 | 11.74778 |
| H | 4.08105  | 4.40412 | 8.07205  | C | 3.8275   | 4.7133  | 11.0781  |
| H | 3.62971  | 3.08929 | 9.13062  | C | 3.7752   | 3.7582  | 12.1056  |
| H | 2.62098  | 3.49544 | 7.76292  | C | 0.36056  | 2.50669 | 13.48532 |
| C | 2.6767   | 6.398   | 12.90872 | C | 0.57327  | 6.34685 | 9.7102   |
| H | 2.66389  | 5.51179 | 13.5082  | O | -0.62268 | 6.94742 | 9.20628  |
| H | 3.67452  | 6.78124 | 12.85998 | O | -0.89524 | 2.0467  | 13.99156 |
| H | 2.0332   | 7.13311 | 13.34508 | C | -1.76089 | 6.28551 | 9.76418  |
| C | -0.71495 | 6.99415 | 9.16881  | H | -1.7447  | 5.25249 | 9.4858   |
| H | -1.55382 | 6.64701 | 9.73511  | H | -1.73421 | 6.36797 | 10.83066 |
| H | -0.64259 | 8.05826 | 9.25437  | H | -2.65544 | 6.74081 | 9.39351  |
| H | -0.84346 | 6.72691 | 8.14072  | C | -1.92317 | 2.31588 | 13.03458 |
| C | 19.37653 | 5.17495 | 12.91253 | H | -1.98776 | 3.37082 | 12.86773 |

|                              |          |         |          |   |          |         |          |
|------------------------------|----------|---------|----------|---|----------|---------|----------|
| C                            | 19.82283 | 4.86994 | 14.19835 | H | -1.69125 | 1.82269 | 12.11378 |
| C                            | 20.09774 | 6.06543 | 12.11673 | H | -2.85964 | 1.95556 | 13.40617 |
| C                            | 20.99029 | 5.45561 | 14.68874 | O | 0.56202  | 4.7403  | 8.43592  |
| C                            | 21.26467 | 6.65137 | 12.60711 | O | 0.58717  | 4.04376 | 14.82529 |
| C                            | 21.71086 | 6.3466  | 13.89367 | C | 1.04253  | 5.15641 | 9.15533  |
| H                            | 21.34147 | 5.21553 | 15.70278 | C | 0.99393  | 3.60007 | 14.07743 |
| H                            | 21.83302 | 7.35387 | 11.98039 | C | 1.43287  | 3.85134 | 7.73145  |
| C                            | 18.45144 | 4.8059  | 12.62543 | H | 2.3733   | 4.33289 | 7.56234  |
| C                            | 19.60496 | 6.40148 | 10.69692 | H | 1.58495  | 2.96595 | 8.31272  |
| H                            | 19.6104  | 5.51464 | 10.09827 | H | 0.99197  | 3.59001 | 6.79219  |
| H                            | 18.60983 | 6.79141 | 10.74773 | C | 1.56347  | 4.84867 | 15.49151 |
| H                            | 20.25226 | 7.13189 | 10.25828 | H | 2.45562  | 4.277   | 15.64037 |
| C                            | 19.02706 | 3.88665 | 15.0767  | H | 1.78587  | 5.70759 | 14.89343 |
| H                            | 18.20931 | 4.40089 | 15.53685 | H | 1.17944  | 5.1637  | 16.43923 |
| H                            | 18.65104 | 3.08993 | 14.46945 | C | 19.37653 | 5.17495 | 12.91253 |
| H                            | 19.66794 | 3.48593 | 15.83406 | C | 20.07524 | 4.56926 | 13.95679 |
| C                            | 22.99907 | 6.99381 | 14.4352  | C | 19.84523 | 6.36636 | 12.35821 |
| H                            | 23.83794 | 6.64658 | 13.86897 | H | 19.70606 | 3.63005 | 14.39352 |
| H                            | 22.92681 | 8.05793 | 14.34959 | C | 21.0121  | 6.95231 | 12.84873 |
| H                            | 23.1275  | 6.72661 | 15.46331 | H | 19.29434 | 6.84348 | 11.53459 |
| E(SCF) = -3796.18720819 a.u. |          |         |          | H | 21.38145 | 7.89178 | 12.41253 |
| E(zp)=-3794.468598 a.u.      |          |         |          | C | 19.47392 | 3.40428 | 11.10804 |
|                              |          |         |          | C | 20.1065  | 2.31061 | 11.69905 |
|                              |          |         |          | C | 20.06557 | 4.04895 | 10.02142 |
|                              |          |         |          | C | 21.33104 | 1.86159 | 11.20372 |
|                              |          |         |          | H | 19.64007 | 1.80223 | 12.55529 |
|                              |          |         |          | H | 19.56638 | 4.91098 | 9.55539  |
|                              |          |         |          | H | 21.82986 | 0.99981 | 11.67036 |
|                              |          |         |          | C | 18.4565  | 4.7133  | 12.5258  |
|                              |          |         |          | C | 18.5087  | 3.7582  | 11.4982  |
|                              |          |         |          | O | 22.51371 | 6.74973 | 14.2321  |
|                              |          |         |          | O | 22.76612 | 2.19773 | 9.7781   |
|                              |          |         |          | C | 21.71081 | 6.34661 | 13.89379 |
|                              |          |         |          | C | 21.92312 | 2.50657 | 10.11806 |
|                              |          |         |          | C | 23.64065 | 6.2503  | 13.5072  |
|                              |          |         |          | H | 24.53301 | 6.71616 | 13.86993 |

|   |          |         |          |
|---|----------|---------|----------|
| H | 23.7109  | 5.19122 | 13.64248 |
| H | 23.52129 | 6.46984 | 12.46679 |
| C | 22.54075 | 1.21499 | 8.76404  |
| H | 22.04699 | 1.66929 | 7.93055  |
| H | 23.47837 | 0.80964 | 8.44553  |
| H | 21.92825 | 0.4307  | 9.15727  |
| O | 21.72395 | 4.7381  | 15.16557 |
| O | 21.69696 | 4.04436 | 8.77885  |
| C | 20.84722 | 3.86753 | 15.88554 |
| H | 19.90871 | 4.35681 | 16.04271 |
| H | 20.69227 | 2.97143 | 15.32173 |
| H | 21.28467 | 3.62296 | 16.83091 |
| C | 21.17437 | 5.37092 | 8.66924  |
| H | 20.16721 | 5.32899 | 8.31038  |
| H | 21.19134 | 5.84148 | 9.63007  |
| H | 21.77352 | 5.93492 | 7.98526  |
| C | 21.24266 | 5.15505 | 14.44717 |
| C | 21.29005 | 3.60039 | 9.52646  |

E(SCF) = -4938.56425451 a.u.

E(zp)=-4936.590374 a.u.

**3c**

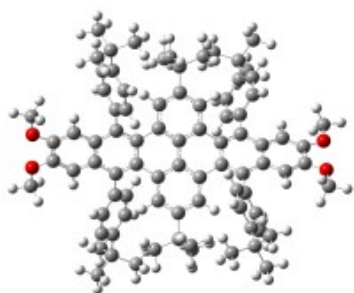

Optimized structure

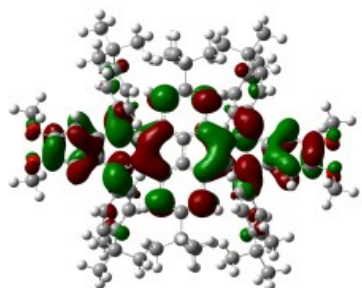

LUMO = -1.17 eV

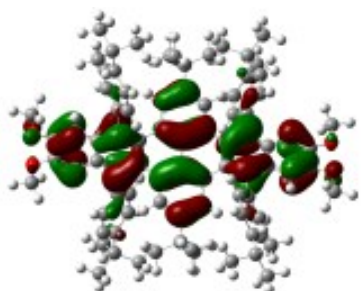

HOMO = -4.81 eV

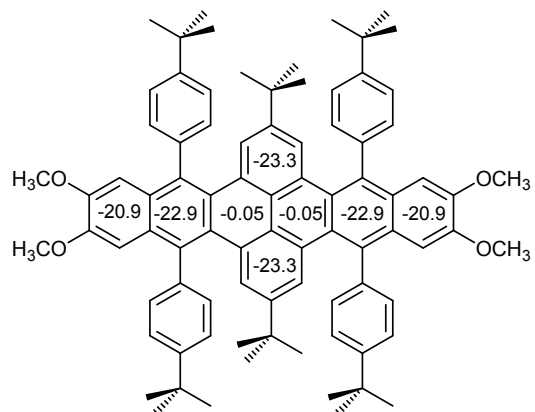

NICS(1)zz

**3hx**

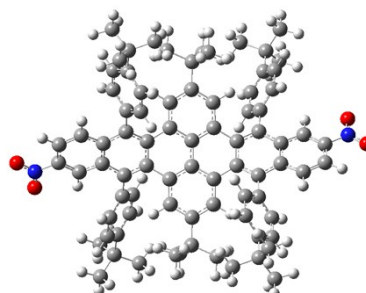

Optimized structure

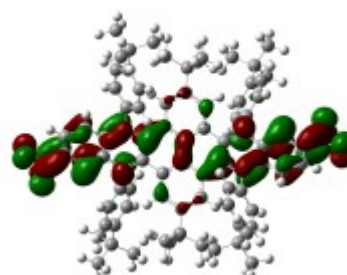

LUMO = -2.40 eV

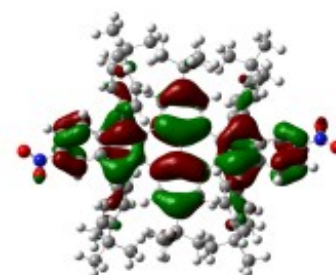

HOMO = -5.54 eV

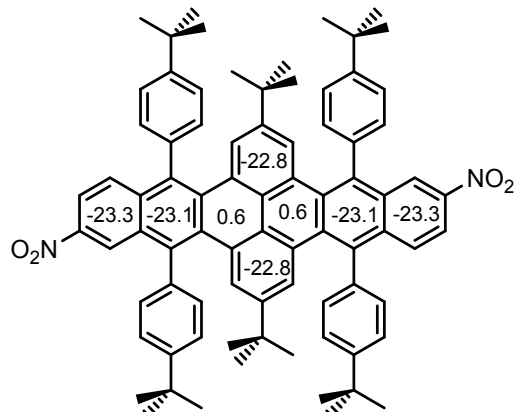

NICS(1)zz

|   |         |         |          |   |         |         |          |
|---|---------|---------|----------|---|---------|---------|----------|
| O | 2.71216 | 5.48809 | 11.09337 | C | 5.0327  | 5.0898  | 10.5352  |
| C | 2.72922 | 6.63692 | 10.2619  | H | 5.06405 | 5.9083  | 10.04875 |
| H | 3.35221 | 7.27843 | 10.61183 | C | 6.262   | 4.5539  | 11.034   |
| H | 1.8523  | 7.02535 | 10.23541 | C | 6.2043  | 3.6924  | 12.1764  |
| H | 2.99491 | 6.38603 | 9.37287  | C | 4.9378  | 3.2485  | 12.6422  |
| C | 3.8275  | 4.7133  | 11.0781  | H | 4.8927  | 2.6074  | 13.3157  |
| C | 5.0327  | 5.0898  | 10.5352  | C | 7.4282  | 3.3899  | 12.8594  |
| H | 5.0501  | 5.7014  | 9.8349   | C | 8.6435  | 3.87    | 12.3495  |
| C | 6.262   | 4.5539  | 11.034   | C | 8.6879  | 4.3944  | 11.0136  |
| C | 6.2043  | 3.6924  | 12.1764  | C | 7.5106  | 4.8498  | 10.4203  |
| C | 4.9378  | 3.2485  | 12.6422  | C | 7.5133  | 5.7589  | 9.2386   |
| H | 4.87925 | 2.40386 | 13.09774 | C | 6.8853  | 5.4499  | 8.0426   |
| C | 7.4282  | 3.3899  | 12.8594  | H | 6.4584  | 4.6295  | 7.9466   |
| C | 8.6435  | 3.87    | 12.3495  | C | 6.8845  | 6.3508  | 6.9773   |
| C | 8.6879  | 4.3944  | 11.0136  | H | 6.4534  | 6.1206  | 6.1874   |
| C | 7.5106  | 4.8498  | 10.4203  | C | 7.5162  | 7.5871  | 7.0749   |
| C | 7.5133  | 5.7589  | 9.2386   | C | 8.1416  | 7.8961  | 8.2897   |
| C | 6.8853  | 5.4499  | 8.0426   | H | 8.5613  | 8.7214  | 8.3872   |
| H | 6.4584  | 4.6295  | 7.9466   | C | 8.1488  | 7.0002  | 9.3519   |
| C | 6.8845  | 6.3508  | 6.9773   | H | 8.5823  | 7.2287  | 10.1434  |
| H | 6.4534  | 6.1206  | 6.1874   | C | 6.5889  | 9.7818  | 6.3683   |
| C | 7.5162  | 7.5871  | 7.0749   | H | 6.5511  | 10.4312 | 5.6618   |
| C | 8.1416  | 7.8961  | 8.2897   | H | 6.9474  | 10.1928 | 7.1598   |
| H | 8.5613  | 8.7214  | 8.3872   | H | 5.7055  | 9.4546  | 6.5493   |
| C | 8.1488  | 7.0002  | 9.3519   | C | 7.488   | 8.6195  | 5.9466   |
| H | 8.5823  | 7.2287  | 10.1434  | C | 6.946   | 8.054   | 4.6421   |
| C | 6.5889  | 9.7818  | 6.3683   | H | 6.83    | 8.7642  | 4.0079   |
| H | 6.5511  | 10.4312 | 5.6618   | H | 6.1017  | 7.6282  | 4.8042   |
| H | 6.9474  | 10.1928 | 7.1598   | H | 7.5655  | 7.4095  | 4.2912   |
| H | 5.7055  | 9.4546  | 6.5493   | C | 8.9036  | 9.1456  | 5.6665   |
| C | 7.488   | 8.6195  | 5.9466   | H | 9.4739  | 8.414   | 5.4179   |
| C | 6.946   | 8.054   | 4.6421   | H | 9.252   | 9.5648  | 6.4564   |
| H | 6.83    | 8.7642  | 4.0079   | H | 8.8747  | 9.7851  | 4.9521   |
| H | 6.1017  | 7.6282  | 4.8042   | C | 7.3848  | 2.5498  | 14.0852  |
| H | 7.5655  | 7.4095  | 4.2912   | C | 8.1839  | 1.4089  | 14.1906  |
| C | 8.9036  | 9.1456  | 5.6665   | H | 8.7242  | 1.1623  | 13.4747  |

|   |         |         |         |   |         |         |         |
|---|---------|---------|---------|---|---------|---------|---------|
| H | 9.4739  | 8.414   | 5.4179  | C | 8.1883  | 0.6412  | 15.3394 |
| H | 9.252   | 9.5648  | 6.4564  | H | 8.7388  | -0.1085 | 15.3756 |
| H | 8.8747  | 9.7851  | 4.9521  | C | 7.4004  | 0.9502  | 16.444  |
| C | 7.3848  | 2.5498  | 14.0852 | C | 6.6152  | 2.0945  | 16.3528 |
| C | 8.1839  | 1.4089  | 14.1906 | H | 6.089   | 2.3443  | 17.0782 |
| H | 8.7242  | 1.1623  | 13.4747 | C | 6.6004  | 2.8737  | 15.204  |
| C | 8.1883  | 0.6412  | 15.3394 | H | 6.0593  | 3.63    | 15.1741 |
| H | 8.7388  | -0.1085 | 15.3756 | C | 7.3605  | 0.0543  | 17.6809 |
| C | 7.4004  | 0.9502  | 16.444  | C | 8.7078  | -0.5458 | 17.9704 |
| C | 6.6152  | 2.0945  | 16.3528 | H | 9.2686  | 0.1151  | 18.3827 |
| H | 6.089   | 2.3443  | 17.0782 | H | 9.1087  | -0.8401 | 17.1506 |
| C | 6.6004  | 2.8737  | 15.204  | H | 8.6025  | -1.2938 | 18.5637 |
| H | 6.0593  | 3.63    | 15.1741 | C | 6.4419  | -1.1656 | 17.3599 |
| C | 7.3605  | 0.0543  | 17.6809 | H | 6.4456  | -1.7739 | 18.1042 |
| C | 8.7078  | -0.5458 | 17.9704 | H | 6.7696  | -1.6161 | 16.5794 |
| H | 9.2686  | 0.1151  | 18.3827 | H | 5.548   | -0.8598 | 17.2009 |
| H | 9.1087  | -0.8401 | 17.1506 | C | 6.6074  | 0.7151  | 18.8453 |
| H | 8.6025  | -1.2938 | 18.5637 | H | 7.1687  | 1.3777  | 19.2545 |
| C | 6.4419  | -1.1656 | 17.3599 | H | 6.3745  | 0.0477  | 19.4952 |
| H | 6.4456  | -1.7739 | 18.1042 | H | 5.8093  | 1.1311  | 18.5149 |
| H | 6.7696  | -1.6161 | 16.5794 | C | 10.0028 | 4.3517  | 10.3243 |
| H | 5.548   | -0.8598 | 17.2009 | C | 11.1759 | 4.1462  | 11.0797 |
| C | 6.6074  | 0.7151  | 18.8453 | C | 12.4265 | 3.9883  | 10.4392 |
| H | 7.1687  | 1.3777  | 19.2545 | C | 12.4732 | 4.1264  | 9.0497  |
| H | 6.3745  | 0.0477  | 19.4952 | H | 13.2989 | 4.087   | 8.6249  |
| H | 5.8093  | 1.1311  | 18.5149 | C | 11.3343 | 4.3204  | 8.2787  |
| C | 10.0028 | 4.3517  | 10.3243 | C | 10.111  | 4.3845  | 8.9286  |
| C | 11.1759 | 4.1462  | 11.0797 | H | 9.3346  | 4.452   | 8.4203  |
| C | 12.4265 | 3.9883  | 10.4392 | C | 11.432  | 4.4158  | 6.746   |
| C | 12.4732 | 4.1264  | 9.0497  | C | 11.2171 | 3.0135  | 6.2015  |
| H | 13.2989 | 4.087   | 8.6249  | H | 12.0675 | 2.5942  | 6.0505  |
| C | 11.3343 | 4.3204  | 8.2787  | H | 10.735  | 3.0611  | 5.3722  |
| C | 10.111  | 4.3845  | 8.9286  | H | 10.715  | 2.4956  | 6.8357  |
| H | 9.3346  | 4.452   | 8.4203  | C | 12.7193 | 4.863   | 6.2881  |
| C | 11.432  | 4.4158  | 6.746   | H | 12.8102 | 5.8033  | 6.4564  |
| C | 11.2171 | 3.0135  | 6.2015  | H | 12.7974 | 4.6969  | 5.3455  |

|   |          |         |          |   |          |         |          |
|---|----------|---------|----------|---|----------|---------|----------|
| H | 12.0675  | 2.5942  | 6.0505   | H | 13.4088  | 4.3845  | 6.7554   |
| H | 10.735   | 3.0611  | 5.3722   | C | 10.3702  | 5.2937  | 6.159    |
| H | 10.715   | 2.4956  | 6.8357   | H | 10.3871  | 6.1502  | 6.5933   |
| C | 12.7193  | 4.863   | 6.2881   | H | 9.5102   | 4.886   | 6.2881   |
| H | 12.8102  | 5.8033  | 6.4564   | H | 10.5306  | 5.4071  | 5.2196   |
| H | 12.7974  | 4.6969  | 5.3455   | C | 17.2512  | 5.0898  | 13.0687  |
| H | 13.4088  | 4.3845  | 6.7554   | H | 17.21997 | 5.9083  | 13.55506 |
| C | 10.3702  | 5.2937  | 6.159    | C | 16.0219  | 4.5539  | 12.5698  |
| H | 10.3871  | 6.1502  | 6.5933   | C | 16.0796  | 3.6924  | 11.4274  |
| H | 9.5102   | 4.886   | 6.2881   | C | 17.3462  | 3.2485  | 10.9616  |
| H | 10.5306  | 5.4071  | 5.2196   | H | 17.3913  | 2.6074  | 10.2881  |
| O | 19.57182 | 5.48812 | 12.51054 | C | 14.8557  | 3.3899  | 10.7445  |
| C | 19.55464 | 6.63692 | 13.34192 | C | 13.6404  | 3.87    | 11.2543  |
| H | 18.93174 | 7.27844 | 12.99209 | C | 13.5961  | 4.3944  | 12.5903  |
| H | 20.43166 | 7.02538 | 13.3685  | C | 14.7733  | 4.8498  | 13.1835  |
| H | 19.28907 | 6.38603 | 14.23104 | C | 14.7707  | 5.7589  | 14.3653  |
| C | 18.4565  | 4.7133  | 12.5258  | C | 15.3987  | 5.4499  | 15.5612  |
| C | 17.2512  | 5.0898  | 13.0687  | H | 15.8256  | 4.6295  | 15.6572  |
| H | 17.2339  | 5.7014  | 13.7689  | C | 15.3994  | 6.3508  | 16.6266  |
| C | 16.0219  | 4.5539  | 12.5698  | H | 15.8306  | 6.1206  | 17.4165  |
| C | 16.0796  | 3.6924  | 11.4274  | C | 14.7677  | 7.5871  | 16.529   |
| C | 17.3462  | 3.2485  | 10.9616  | C | 14.1424  | 7.8961  | 15.3142  |
| H | 17.40477 | 2.40386 | 10.50605 | H | 13.7227  | 8.7214  | 15.2166  |
| C | 14.8557  | 3.3899  | 10.7445  | C | 14.1352  | 7.0002  | 14.252   |
| C | 13.6404  | 3.87    | 11.2543  | H | 13.7017  | 7.2287  | 13.4605  |
| C | 13.5961  | 4.3944  | 12.5903  | C | 15.6951  | 9.7818  | 17.2355  |
| C | 14.7733  | 4.8498  | 13.1835  | H | 15.7329  | 10.4312 | 17.9421  |
| C | 14.7707  | 5.7589  | 14.3653  | H | 15.3366  | 10.1928 | 16.444   |
| C | 15.3987  | 5.4499  | 15.5612  | H | 16.5784  | 9.4546  | 17.0546  |
| H | 15.8256  | 4.6295  | 15.6572  | C | 14.796   | 8.6195  | 17.6573  |
| C | 15.3994  | 6.3508  | 16.6266  | C | 15.3379  | 8.054   | 18.9618  |
| H | 15.8306  | 6.1206  | 17.4165  | H | 15.4539  | 8.7642  | 19.5959  |
| C | 14.7677  | 7.5871  | 16.529   | H | 16.1822  | 7.6282  | 18.7997  |
| C | 14.1424  | 7.8961  | 15.3142  | H | 14.7185  | 7.4095  | 19.3127  |
| H | 13.7227  | 8.7214  | 15.2166  | C | 13.3804  | 9.1456  | 17.9374  |
| C | 14.1352  | 7.0002  | 14.252   | H | 12.8101  | 8.414   | 18.186   |



|   |         |         |         |   |         |         |         |
|---|---------|---------|---------|---|---------|---------|---------|
| H | 13.7017 | 7.2287  | 13.4605 | H | 13.032  | 9.5648  | 17.1474 |
| C | 15.6951 | 9.7818  | 17.2355 | H | 13.4093 | 9.7851  | 18.6518 |
| H | 15.7329 | 10.4312 | 17.9421 | C | 14.8992 | 2.5498  | 9.5187  |
| H | 15.3366 | 10.1928 | 16.444  | C | 14.1001 | 1.4089  | 9.4132  |
| H | 16.5784 | 9.4546  | 17.0546 | H | 13.5598 | 1.1623  | 10.1292 |
| C | 14.796  | 8.6195  | 17.6573 | C | 14.0956 | 0.6412  | 8.2645  |
| C | 15.3379 | 8.054   | 18.9618 | H | 13.5451 | -0.1085 | 8.2283  |
| H | 15.4539 | 8.7642  | 19.5959 | C | 14.8836 | 0.9502  | 7.1598  |
| H | 16.1822 | 7.6282  | 18.7997 | C | 15.6688 | 2.0945  | 7.2511  |
| H | 14.7185 | 7.4095  | 19.3127 | H | 16.195  | 2.3443  | 6.5257  |
| C | 13.3804 | 9.1456  | 17.9374 | C | 15.6836 | 2.8737  | 8.3998  |
| H | 12.8101 | 8.414   | 18.186  | H | 16.2247 | 3.63    | 8.4297  |
| H | 13.032  | 9.5648  | 17.1474 | C | 14.9235 | 0.0543  | 5.923   |
| H | 13.4093 | 9.7851  | 18.6518 | C | 13.5761 | -0.5458 | 5.6335  |
| C | 14.8992 | 2.5498  | 9.5187  | H | 13.0154 | 0.1151  | 5.2212  |
| C | 14.1001 | 1.4089  | 9.4132  | H | 13.1753 | -0.8401 | 6.4533  |
| H | 13.5598 | 1.1623  | 10.1292 | H | 13.6815 | -1.2938 | 5.0402  |
| C | 14.0956 | 0.6412  | 8.2645  | C | 15.842  | -1.1656 | 6.244   |
| H | 13.5451 | -0.1085 | 8.2283  | H | 15.8384 | -1.7739 | 5.4997  |
| C | 14.8836 | 0.9502  | 7.1598  | H | 15.5143 | -1.6161 | 7.0245  |
| C | 15.6688 | 2.0945  | 7.2511  | H | 16.736  | -0.8598 | 6.4029  |
| H | 16.195  | 2.3443  | 6.5257  | C | 15.6766 | 0.7151  | 4.7585  |
| C | 15.6836 | 2.8737  | 8.3998  | H | 15.1153 | 1.3777  | 4.3494  |
| H | 16.2247 | 3.63    | 8.4297  | H | 15.9095 | 0.0477  | 4.1086  |
| C | 14.9235 | 0.0543  | 5.923   | H | 16.4747 | 1.1311  | 5.089   |
| C | 13.5761 | -0.5458 | 5.6335  | C | 12.2812 | 4.3517  | 13.2795 |
| H | 13.0154 | 0.1151  | 5.2212  | C | 11.1081 | 4.1462  | 12.5242 |
| H | 13.1753 | -0.8401 | 6.4533  | C | 9.8575  | 3.9883  | 13.1647 |
| H | 13.6815 | -1.2938 | 5.0402  | C | 9.8107  | 4.1264  | 14.5541 |
| C | 15.842  | -1.1656 | 6.244   | H | 8.9851  | 4.087   | 14.979  |
| H | 15.8384 | -1.7739 | 5.4997  | C | 10.9497 | 4.3204  | 15.3252 |
| H | 15.5143 | -1.6161 | 7.0245  | C | 12.173  | 4.3845  | 14.6753 |
| H | 16.736  | -0.8598 | 6.4029  | H | 12.9493 | 4.452   | 15.1836 |
| C | 15.6766 | 0.7151  | 4.7585  | C | 10.852  | 4.4158  | 16.8579 |
| H | 15.1153 | 1.3777  | 4.3494  | C | 11.0669 | 3.0135  | 17.4023 |
| H | 15.9095 | 0.0477  | 4.1086  | H | 10.2165 | 2.5942  | 17.5534 |

|   |          |         |          |   |          |         |          |
|---|----------|---------|----------|---|----------|---------|----------|
| H | 16.4747  | 1.1311  | 5.089    | H | 11.549   | 3.0611  | 18.2316  |
| C | 12.2812  | 4.3517  | 13.2795  | H | 11.5689  | 2.4956  | 16.7682  |
| C | 11.1081  | 4.1462  | 12.5242  | C | 9.5647   | 4.863   | 17.3158  |
| C | 9.8575   | 3.9883  | 13.1647  | H | 9.4738   | 5.8033  | 17.1474  |
| C | 9.8107   | 4.1264  | 14.5541  | H | 9.4865   | 4.6969  | 18.2584  |
| H | 8.9851   | 4.087   | 14.979   | H | 8.8752   | 4.3845  | 16.8484  |
| C | 10.9497  | 4.3204  | 15.3252  | C | 11.9138  | 5.2937  | 17.4448  |
| C | 12.173   | 4.3845  | 14.6753  | H | 11.8968  | 6.1502  | 17.0105  |
| H | 12.9493  | 4.452   | 15.1836  | H | 12.7738  | 4.886   | 17.3158  |
| C | 10.852   | 4.4158  | 16.8579  | H | 11.7534  | 5.4071  | 18.3843  |
| C | 11.0669  | 3.0135  | 17.4023  | C | 3.7752   | 3.7582  | 12.1056  |
| H | 10.2165  | 2.5942  | 17.5534  | H | 3.25201  | 2.88112 | 11.41781 |
| H | 11.549   | 3.0611  | 18.2316  | C | 18.5087  | 3.7582  | 11.4982  |
| H | 11.5689  | 2.4956  | 16.7682  | H | 19.03108 | 2.87984 | 12.18502 |
| C | 9.5647   | 4.863   | 17.3158  | N | 2.95097  | 5.1532  | 10.70967 |
| H | 9.4738   | 5.8033  | 17.1474  | O | 2.51219  | 4.76168 | 9.66439  |
| H | 9.4865   | 4.6969  | 18.2584  | O | 2.43544  | 6.02366 | 11.35382 |
| H | 8.8752   | 4.3845  | 16.8484  | N | 19.33305 | 5.15313 | 12.89425 |
| C | 11.9138  | 5.2937  | 17.4448  | O | 19.76511 | 4.76996 | 13.94541 |
| H | 11.8968  | 6.1502  | 17.0105  | O | 19.85534 | 6.01518 | 12.24425 |
| H | 12.7738  | 4.886   | 17.3158  | C | 18.4565  | 4.7133  | 12.5258  |
| H | 11.7534  | 5.4071  | 18.3843  | C | 3.8275   | 4.7133  | 11.0781  |
| C | 2.99242  | 2.24664 | 13.44228 |   |          |         |          |
| H | 2.01206  | 1.88686 | 13.83879 |   |          |         |          |
| H | 3.49265  | 1.3937  | 12.92233 |   |          |         |          |
| H | 3.62942  | 2.54898 | 14.30882 |   |          |         |          |
| O | 2.79453  | 3.39867 | 12.50186 |   |          |         |          |
| C | 19.29403 | 2.22513 | 10.18776 |   |          |         |          |
| H | 20.27433 | 1.86532 | 9.79114  |   |          |         |          |
| H | 18.80531 | 1.37928 | 10.72976 |   |          |         |          |
| H | 18.64765 | 2.50348 | 9.32013  |   |          |         |          |
| O | 19.48931 | 3.39864 | 11.10182 |   |          |         |          |
| C | 18.5087  | 3.7582  | 11.4982  |   |          |         |          |
| C | 3.7752   | 3.7582  | 12.1056  |   |          |         |          |

E(SCF)=-3507.15414794 a.u.

E(zp)=-3505.757033 a.u.

E(SCF)=-3556.24434104 a.u.

E(zp)=-3554.722276 a.u.

**3l**

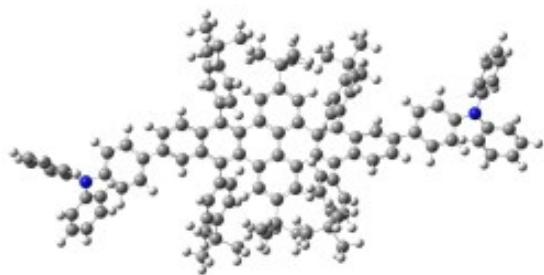

Optimized structure

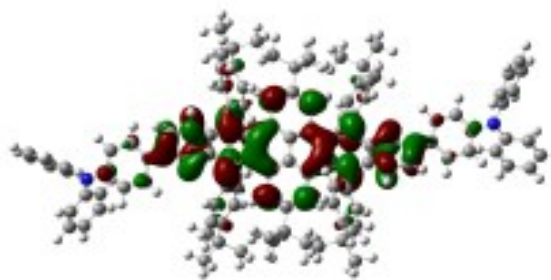

LUMO = -1.49 eV

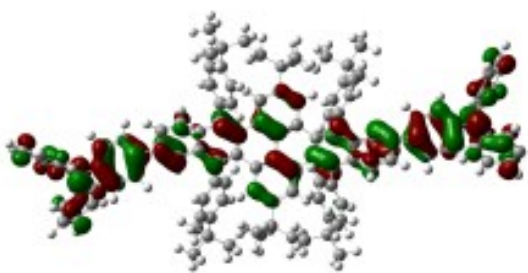

HOMO = -4.77 eV

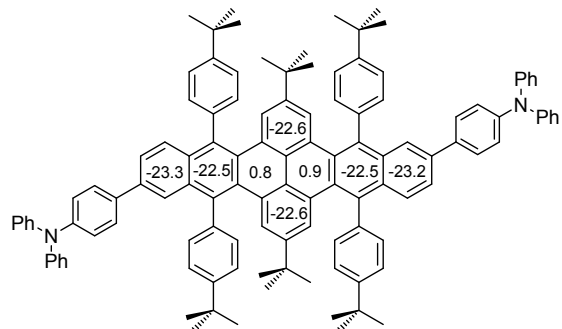

NICS(1)zz

**3b**

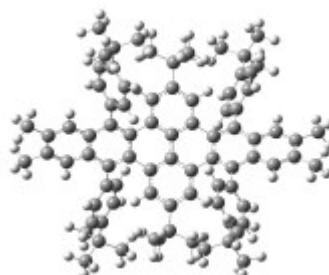

Optimized structure

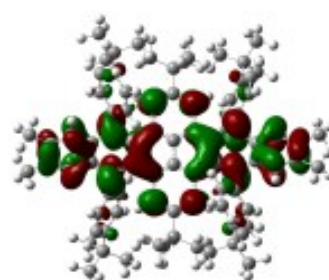

LUMO = -1.31 eV

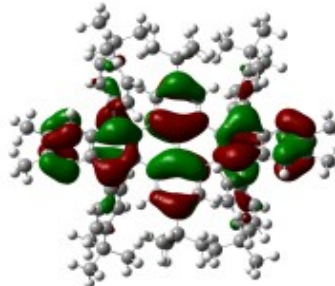

HOMO = -4.89 eV

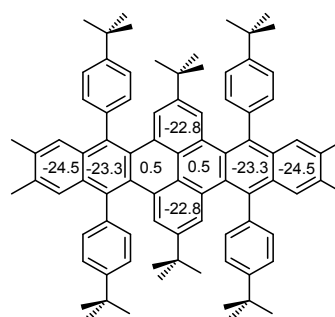

NICS(1)zz

|   |         |         |          |   |        |         |         |
|---|---------|---------|----------|---|--------|---------|---------|
| C | 5.0327  | 5.0898  | 0.5352   | C | 3.8275 | 4.7133  | 11.0781 |
| H | 5.06405 | 5.9083  | 10.04875 | C | 5.0327 | 5.0898  | 10.5352 |
| C | 6.262   | 4.5539  | 11.034   | H | 5.0501 | 5.7014  | 9.8349  |
| C | 6.2043  | 3.6924  | 12.1764  | C | 6.262  | 4.5539  | 11.034  |
| C | 4.9378  | 3.2485  | 12.6422  | C | 6.2043 | 3.6924  | 12.1764 |
| H | 4.8927  | 2.6074  | 13.3157  | C | 4.9378 | 3.2485  | 12.6422 |
| C | 7.4282  | 3.3899  | 12.8594  | H | 4.8927 | 2.6074  | 13.3157 |
| C | 8.6435  | 3.87    | 12.3495  | C | 7.4282 | 3.3899  | 12.8594 |
| C | 8.6879  | 4.3944  | 11.0136  | C | 8.6435 | 3.87    | 12.3495 |
| C | 7.5106  | 4.8498  | 10.4203  | C | 8.6879 | 4.3944  | 11.0136 |
| C | 7.5133  | 5.7589  | 9.2386   | C | 7.5106 | 4.8498  | 10.4203 |
| C | 6.8853  | 5.4499  | 8.0426   | C | 7.5133 | 5.7589  | 9.2386  |
| H | 6.4584  | 4.6295  | 7.9466   | C | 6.8853 | 5.4499  | 8.0426  |
| C | 6.8845  | 6.3508  | 6.9773   | H | 6.4584 | 4.6295  | 7.9466  |
| H | 6.4534  | 6.1206  | 6.1874   | C | 6.8845 | 6.3508  | 6.9773  |
| C | 7.5162  | 7.5871  | 7.0749   | H | 6.4534 | 6.1206  | 6.1874  |
| C | 8.1416  | 7.8961  | 8.2897   | C | 7.5162 | 7.5871  | 7.0749  |
| H | 8.5613  | 8.7214  | 8.3872   | C | 8.1416 | 7.8961  | 8.2897  |
| C | 8.1488  | 7.0002  | 9.3519   | H | 8.5613 | 8.7214  | 8.3872  |
| H | 8.5823  | 7.2287  | 10.1434  | C | 8.1488 | 7.0002  | 9.3519  |
| C | 6.5889  | 9.7818  | 6.3683   | H | 8.5823 | 7.2287  | 10.1434 |
| H | 6.5511  | 10.4312 | 5.6618   | C | 6.5889 | 9.7818  | 6.3683  |
| H | 6.9474  | 10.1928 | 7.1598   | H | 6.5511 | 10.4312 | 5.6618  |
| H | 5.7055  | 9.4546  | 6.5493   | H | 6.9474 | 10.1928 | 7.1598  |
| C | 7.488   | 8.6195  | 5.9466   | H | 5.7055 | 9.4546  | 6.5493  |
| C | 6.946   | 8.054   | 4.6421   | C | 7.488  | 8.6195  | 5.9466  |
| H | 6.83    | 8.7642  | 4.0079   | C | 6.946  | 8.054   | 4.6421  |
| H | 6.1017  | 7.6282  | 4.8042   | H | 6.83   | 8.7642  | 4.0079  |
| H | 7.5655  | 7.4095  | 4.2912   | H | 6.1017 | 7.6282  | 4.8042  |
| C | 8.9036  | 9.1456  | 5.6665   | H | 7.5655 | 7.4095  | 4.2912  |
| H | 9.4739  | 8.414   | 5.4179   | C | 8.9036 | 9.1456  | 5.6665  |
| H | 9.252   | 9.5648  | 6.4564   | H | 9.4739 | 8.414   | 5.4179  |
| H | 8.8747  | 9.7851  | 4.9521   | H | 9.252  | 9.5648  | 6.4564  |
| C | 7.3848  | 2.5498  | 14.0852  | H | 8.8747 | 9.7851  | 4.9521  |
| C | 8.1839  | 1.4089  | 14.1906  | C | 7.3848 | 2.5498  | 14.0852 |

|   |         |         |         |   |         |         |         |
|---|---------|---------|---------|---|---------|---------|---------|
| H | 8.7242  | 1.1623  | 13.4747 | C | 8.1839  | 1.4089  | 14.1906 |
| C | 8.1883  | 0.6412  | 15.3394 | H | 8.7242  | 1.1623  | 13.4747 |
| H | 8.7388  | -0.1085 | 15.3756 | C | 8.1883  | 0.6412  | 15.3394 |
| C | 7.4004  | 0.9502  | 16.444  | H | 8.7388  | -0.1085 | 15.3756 |
| C | 6.6152  | 2.0945  | 16.3528 | C | 7.4004  | 0.9502  | 16.444  |
| H | 6.089   | 2.3443  | 17.0782 | C | 6.6152  | 2.0945  | 16.3528 |
| C | 6.6004  | 2.8737  | 15.204  | H | 6.089   | 2.3443  | 17.0782 |
| H | 6.0593  | 3.63    | 15.1741 | C | 6.6004  | 2.8737  | 15.204  |
| C | 7.3605  | 0.0543  | 17.6809 | H | 6.0593  | 3.63    | 15.1741 |
| C | 8.7078  | -0.5458 | 17.9704 | C | 7.3605  | 0.0543  | 17.6809 |
| H | 9.2686  | 0.1151  | 18.3827 | C | 8.7078  | -0.5458 | 17.9704 |
| H | 9.1087  | -0.8401 | 17.1506 | H | 9.2686  | 0.1151  | 18.3827 |
| H | 8.6025  | -1.2938 | 18.5637 | H | 9.1087  | -0.8401 | 17.1506 |
| C | 6.4419  | -1.1656 | 17.3599 | H | 8.6025  | -1.2938 | 18.5637 |
| H | 6.4456  | -1.7739 | 18.1042 | C | 6.4419  | -1.1656 | 17.3599 |
| H | 6.7696  | -1.6161 | 16.5794 | H | 6.4456  | -1.7739 | 18.1042 |
| H | 5.548   | -0.8598 | 17.2009 | H | 6.7696  | -1.6161 | 16.5794 |
| C | 6.6074  | 0.7151  | 18.8453 | H | 5.548   | -0.8598 | 17.2009 |
| H | 7.1687  | 1.3777  | 19.2545 | C | 6.6074  | 0.7151  | 18.8453 |
| H | 6.3745  | 0.0477  | 19.4952 | H | 7.1687  | 1.3777  | 19.2545 |
| H | 5.8093  | 1.1311  | 18.5149 | H | 6.3745  | 0.0477  | 19.4952 |
| C | 10.0028 | 4.3517  | 10.3243 | H | 5.8093  | 1.1311  | 18.5149 |
| C | 11.1759 | 4.1462  | 11.0797 | C | 10.0028 | 4.3517  | 10.3243 |
| C | 12.4265 | 3.9883  | 10.4392 | C | 11.1759 | 4.1462  | 11.0797 |
| C | 12.4732 | 4.1264  | 9.0497  | C | 12.4265 | 3.9883  | 10.4392 |
| H | 13.2989 | 4.087   | 8.6249  | C | 12.4732 | 4.1264  | 9.0497  |
| C | 11.3343 | 4.3204  | 8.2787  | H | 13.2989 | 4.087   | 8.6249  |
| C | 10.111  | 4.3845  | 8.9286  | C | 11.3343 | 4.3204  | 8.2787  |
| H | 9.3346  | 4.452   | 8.4203  | C | 10.111  | 4.3845  | 8.9286  |
| C | 11.432  | 4.4158  | 6.746   | H | 9.3346  | 4.452   | 8.4203  |
| C | 11.2171 | 3.0135  | 6.2015  | C | 11.432  | 4.4158  | 6.746   |
| H | 12.0675 | 2.5942  | 6.0505  | C | 11.2171 | 3.0135  | 6.2015  |
| H | 10.735  | 3.0611  | 5.3722  | H | 12.0675 | 2.5942  | 6.0505  |
| H | 10.715  | 2.4956  | 6.8357  | H | 10.735  | 3.0611  | 5.3722  |
| C | 12.7193 | 4.863   | 6.2881  | H | 10.715  | 2.4956  | 6.8357  |
| H | 12.8102 | 5.8033  | 6.4564  | C | 12.7193 | 4.863   | 6.2881  |

|   |          |         |          |   |         |         |         |
|---|----------|---------|----------|---|---------|---------|---------|
| H | 12.7974  | 4.6969  | 5.3455   | H | 12.8102 | 5.8033  | 6.4564  |
| H | 13.4088  | 4.3845  | 6.7554   | H | 12.7974 | 4.6969  | 5.3455  |
| C | 10.3702  | 5.2937  | 6.159    | H | 13.4088 | 4.3845  | 6.7554  |
| H | 10.3871  | 6.1502  | 6.5933   | C | 10.3702 | 5.2937  | 6.159   |
| H | 9.5102   | 4.886   | 6.2881   | H | 10.3871 | 6.1502  | 6.5933  |
| H | 10.5306  | 5.4071  | 5.2196   | H | 9.5102  | 4.886   | 6.2881  |
| C | 17.2512  | 5.0898  | 13.0687  | H | 10.5306 | 5.4071  | 5.2196  |
| H | 17.21997 | 5.9083  | 13.55506 | C | 18.4565 | 4.7133  | 12.5258 |
| C | 16.0219  | 4.5539  | 12.5698  | C | 17.2512 | 5.0898  | 13.0687 |
| C | 16.0796  | 3.6924  | 11.4274  | C | 16.0219 | 4.5539  | 12.5698 |
| C | 17.3462  | 3.2485  | 10.9616  | C | 16.0796 | 3.6924  | 11.4274 |
| H | 17.3913  | 2.6074  | 10.2881  | C | 17.3462 | 3.2485  | 10.9616 |
| C | 14.8557  | 3.3899  | 10.7445  | H | 17.3913 | 2.6074  | 10.2881 |
| C | 13.6404  | 3.87    | 11.2543  | C | 14.8557 | 3.3899  | 10.7445 |
| C | 13.5961  | 4.3944  | 12.5903  | C | 13.6404 | 3.87    | 11.2543 |
| C | 14.7733  | 4.8498  | 13.1835  | C | 13.5961 | 4.3944  | 12.5903 |
| C | 14.7707  | 5.7589  | 14.3653  | C | 14.7733 | 4.8498  | 13.1835 |
| C | 15.3987  | 5.4499  | 15.5612  | C | 14.7707 | 5.7589  | 14.3653 |
| H | 15.8256  | 4.6295  | 15.6572  | C | 15.3987 | 5.4499  | 15.5612 |
| C | 15.3994  | 6.3508  | 16.6266  | H | 15.8256 | 4.6295  | 15.6572 |
| H | 15.8306  | 6.1206  | 17.4165  | C | 15.3994 | 6.3508  | 16.6266 |
| C | 14.7677  | 7.5871  | 16.529   | H | 15.8306 | 6.1206  | 17.4165 |
| C | 14.1424  | 7.8961  | 15.3142  | C | 14.7677 | 7.5871  | 16.529  |
| H | 13.7227  | 8.7214  | 15.2166  | C | 14.1424 | 7.8961  | 15.3142 |
| C | 14.1352  | 7.0002  | 14.252   | H | 13.7227 | 8.7214  | 15.2166 |
| H | 13.7017  | 7.2287  | 13.4605  | C | 14.1352 | 7.0002  | 14.252  |
| C | 15.6951  | 9.7818  | 17.2355  | H | 13.7017 | 7.2287  | 13.4605 |
| H | 15.7329  | 10.4312 | 17.9421  | C | 15.6951 | 9.7818  | 17.2355 |
| H | 15.3366  | 10.1928 | 16.444   | H | 15.7329 | 10.4312 | 17.9421 |
| H | 16.5784  | 9.4546  | 17.0546  | H | 15.3366 | 10.1928 | 16.444  |
| C | 14.796   | 8.6195  | 17.6573  | H | 16.5784 | 9.4546  | 17.0546 |
| C | 15.3379  | 8.054   | 18.9618  | C | 14.796  | 8.6195  | 17.6573 |
| H | 15.4539  | 8.7642  | 19.5959  | C | 15.3379 | 8.054   | 18.9618 |
| H | 16.1822  | 7.6282  | 18.7997  | H | 15.4539 | 8.7642  | 19.5959 |
| H | 14.7185  | 7.4095  | 19.3127  | H | 16.1822 | 7.6282  | 18.7997 |
| C | 13.3804  | 9.1456  | 17.9374  | H | 14.7185 | 7.4095  | 19.3127 |

|   |         |         |         |   |         |         |         |
|---|---------|---------|---------|---|---------|---------|---------|
| H | 12.8101 | 8.414   | 18.186  | C | 13.3804 | 9.1456  | 17.9374 |
| H | 13.032  | 9.5648  | 17.1474 | H | 12.8101 | 8.414   | 18.186  |
| H | 13.4093 | 9.7851  | 18.6518 | H | 13.032  | 9.5648  | 17.1474 |
| C | 14.8992 | 2.5498  | 9.5187  | H | 13.4093 | 9.7851  | 18.6518 |
| C | 14.1001 | 1.4089  | 9.4132  | C | 14.8992 | 2.5498  | 9.5187  |
| H | 13.5598 | 1.1623  | 10.1292 | C | 14.1001 | 1.4089  | 9.4132  |
| C | 14.0956 | 0.6412  | 8.2645  | H | 13.5598 | 1.1623  | 10.1292 |
| H | 13.5451 | -0.1085 | 8.2283  | C | 14.0956 | 0.6412  | 8.2645  |
| C | 14.8836 | 0.9502  | 7.1598  | H | 13.5451 | -0.1085 | 8.2283  |
| C | 15.6688 | 2.0945  | 7.2511  | C | 14.8836 | 0.9502  | 7.1598  |
| H | 16.195  | 2.3443  | 6.5257  | C | 15.6688 | 2.0945  | 7.2511  |
| C | 15.6836 | 2.8737  | 8.3998  | H | 16.195  | 2.3443  | 6.5257  |
| H | 16.2247 | 3.63    | 8.4297  | C | 15.6836 | 2.8737  | 8.3998  |
| C | 14.9235 | 0.0543  | 5.923   | H | 16.2247 | 3.63    | 8.4297  |
| C | 13.5761 | -0.5458 | 5.6335  | C | 14.9235 | 0.0543  | 5.923   |
| H | 13.0154 | 0.1151  | 5.2212  | C | 13.5761 | -0.5458 | 5.6335  |
| H | 13.1753 | -0.8401 | 6.4533  | H | 13.0154 | 0.1151  | 5.2212  |
| H | 13.6815 | -1.2938 | 5.0402  | H | 13.1753 | -0.8401 | 6.4533  |
| C | 15.842  | -1.1656 | 6.244   | H | 13.6815 | -1.2938 | 5.0402  |
| H | 15.8384 | -1.7739 | 5.4997  | C | 15.842  | -1.1656 | 6.244   |
| H | 15.5143 | -1.6161 | 7.0245  | H | 15.8384 | -1.7739 | 5.4997  |
| H | 16.736  | -0.8598 | 6.4029  | H | 15.5143 | -1.6161 | 7.0245  |
| C | 15.6766 | 0.7151  | 4.7585  | H | 16.736  | -0.8598 | 6.4029  |
| H | 15.1153 | 1.3777  | 4.3494  | C | 15.6766 | 0.7151  | 4.7585  |
| H | 15.9095 | 0.0477  | 4.1086  | H | 15.1153 | 1.3777  | 4.3494  |
| H | 16.4747 | 1.1311  | 5.089   | H | 15.9095 | 0.0477  | 4.1086  |
| C | 12.2812 | 4.3517  | 13.2795 | H | 16.4747 | 1.1311  | 5.089   |
| C | 11.1081 | 4.1462  | 12.5242 | C | 12.2812 | 4.3517  | 13.2795 |
| C | 9.8575  | 3.9883  | 13.1647 | C | 11.1081 | 4.1462  | 12.5242 |
| C | 9.8107  | 4.1264  | 14.5541 | C | 9.8575  | 3.9883  | 13.1647 |
| H | 8.9851  | 4.087   | 14.979  | C | 9.8107  | 4.1264  | 14.5541 |
| C | 10.9497 | 4.3204  | 15.3252 | H | 8.9851  | 4.087   | 14.979  |
| C | 12.173  | 4.3845  | 14.6753 | C | 10.9497 | 4.3204  | 15.3252 |
| H | 12.9493 | 4.452   | 15.1836 | C | 12.173  | 4.3845  | 14.6753 |
| C | 10.852  | 4.4158  | 16.8579 | H | 12.9493 | 4.452   | 15.1836 |
| C | 11.0669 | 3.0135  | 17.4023 | C | 10.852  | 4.4158  | 16.8579 |

|   |          |          |          |   |          |          |          |
|---|----------|----------|----------|---|----------|----------|----------|
| H | 10.2165  | 2.5942   | 17.5534  | C | 11.0669  | 3.0135   | 17.4023  |
| H | 11.549   | 3.0611   | 18.2316  | H | 10.2165  | 2.5942   | 17.5534  |
| H | 11.5689  | 2.4956   | 16.7682  | H | 11.549   | 3.0611   | 18.2316  |
| C | 9.5647   | 4.863    | 17.3158  | H | 11.5689  | 2.4956   | 16.7682  |
| H | 9.4738   | 5.8033   | 17.1474  | C | 9.5647   | 4.863    | 17.3158  |
| H | 9.4865   | 4.6969   | 18.2584  | H | 9.4738   | 5.8033   | 17.1474  |
| H | 8.8752   | 4.3845   | 16.8484  | H | 9.4865   | 4.6969   | 18.2584  |
| C | 11.9138  | 5.2937   | 17.4448  | H | 8.8752   | 4.3845   | 16.8484  |
| H | 11.8968  | 6.1502   | 17.0105  | C | 11.9138  | 5.2937   | 17.4448  |
| H | 12.7738  | 4.886    | 17.3158  | H | 11.8968  | 6.1502   | 17.0105  |
| H | 11.7534  | 5.4071   | 18.3843  | H | 12.7738  | 4.886    | 17.3158  |
| C | 3.7752   | 3.7582   | 12.1056  | H | 11.7534  | 5.4071   | 18.3843  |
| H | 3.25201  | 2.88112  | 11.41781 | C | 3.7752   | 3.7582   | 12.1056  |
| C | 18.5087  | 3.7582   | 11.4982  | C | 3.25201  | 2.88112  | 11.41781 |
| H | 19.03108 | 2.87984  | 12.18502 | H | 18.5087  | 3.7582   | 11.4982  |
| C | 19.37653 | 5.17495  | 12.91253 | C | 19.03108 | 2.87984  | 12.18502 |
| C | 19.91422 | 4.74788  | 14.12663 | H | 19.37653 | 5.17495  | 12.91253 |
| C | 20.00631 | 6.18759  | 12.18841 | H | 19.91422 | 4.74788  | 14.12663 |
| C | 21.08167 | 5.33359  | 14.61701 | H | 20.00631 | 6.18759  | 12.18841 |
| H | 19.41809 | 3.94952  | 14.69726 | C | 21.08167 | 5.33359  | 14.61701 |
| C | 21.17322 | 6.77353  | 12.67884 | H | 19.41809 | 3.94952  | 14.69726 |
| H | 19.58236 | 6.52383  | 11.23098 | H | 21.17322 | 6.77353  | 12.67884 |
| C | 21.71084 | 6.34661  | 13.89371 | H | 19.58236 | 6.52383  | 11.23098 |
| H | 21.50491 | 4.9972   | 15.57459 | C | 21.71084 | 6.34661  | 13.89371 |
| H | 21.66951 | 7.57224  | 12.1087  | H | 21.50491 | 4.9972   | 15.57459 |
| N | 22.94046 | 6.96439  | 14.41072 | H | 21.66951 | 7.57224  | 12.1087  |
| C | 23.62332 | 7.6808   | 13.32382 | H | 22.94046 | 6.96439  | 14.41072 |
| C | 23.46393 | 9.05994  | 13.18926 | C | 23.62332 | 7.6808   | 13.32382 |
| C | 24.43133 | 6.98119  | 12.42712 | H | 23.46393 | 9.05994  | 13.18926 |
| C | 24.1123  | 9.73972  | 12.15775 | H | 24.43133 | 6.98119  | 12.42712 |
| H | 22.82736 | 9.61148  | 13.89617 | H | 24.1123  | 9.73972  | 12.15775 |
| C | 25.07919 | 7.66066  | 11.39555 | H | 22.82736 | 9.61148  | 13.89617 |
| H | 24.55714 | 5.89386  | 12.5337  | H | 25.07919 | 7.66066  | 11.39555 |
| C | 24.91931 | 9.04032  | 11.26065 | H | 24.55714 | 5.89386  | 12.5337  |
| H | 23.98582 | 10.82689 | 12.05148 | C | 24.91931 | 9.04032  | 11.26065 |
| H | 25.71559 | 7.10943  | 10.68813 | H | 23.98582 | 10.82689 | 12.05148 |

E(SCF) = -3255.43167327 a.u.

E(zp)=-3253.928632 a.u.



|   |          |         |          |
|---|----------|---------|----------|
| H | 25.42989 | 9.57596 | 10.4472  |
| C | 23.82763 | 5.91972 | 14.94223 |
| C | 24.23451 | 4.86679 | 14.12289 |
| C | 24.26307 | 5.9818  | 16.26622 |
| C | 25.0767  | 3.87554 | 14.62748 |
| H | 23.89162 | 4.81797 | 13.07925 |
| C | 25.10468 | 4.99057 | 16.7709  |
| H | 23.94243 | 6.81233 | 16.91188 |
| C | 25.51131 | 3.93692 | 15.95132 |
| H | 25.39668 | 3.04515 | 13.98149 |
| H | 25.44753 | 5.03879 | 17.81465 |
| H | 26.17462 | 3.15531 | 16.3493  |
| C | 2.9075   | 5.17502 | 10.69139 |
| C | 2.37096  | 4.74951 | 9.47623  |
| C | 2.27659  | 6.18617 | 11.4166  |
| C | 1.20354  | 5.33531 | 8.98588  |
| H | 2.86798  | 3.95232 | 8.90475  |
| C | 1.10971  | 6.77221 | 10.9262  |
| H | 2.69963  | 6.52118 | 12.37487 |
| C | 0.57324  | 6.34685 | 9.71027  |
| H | 0.78122  | 5.00016 | 8.02747  |
| H | 0.61253  | 7.56975 | 11.49721 |
| C | 3.8275   | 4.7133  | 11.0781  |
| N | -0.65634 | 6.96472 | 9.19329  |
| C | -1.52061 | 5.92612 | 8.61429  |
| C | -2.28318 | 5.10845 | 9.44822  |
| C | -1.57846 | 5.75866 | 7.23044  |
| C | -3.10355 | 4.12294 | 8.89846  |
| H | -2.23789 | 5.24059 | 10.53892 |
| C | -2.39825 | 4.7731  | 6.68077  |
| H | -0.97741 | 6.40378 | 6.57315  |
| C | -3.16075 | 3.95475 | 7.51511  |
| H | -3.70404 | 3.47796 | 9.55623  |
| H | -2.44356 | 4.64034 | 5.59007  |
| H | -3.80688 | 3.17757 | 7.08175  |
| C | -1.36609 | 7.63676 | 10.29126 |

|   |          |          |          |
|---|----------|----------|----------|
| C | -1.85933 | 6.89177  | 11.36236 |
| C | -1.54584 | 9.01996  | 10.26215 |
| C | -2.53271 | 7.52982  | 12.40443 |
| H | -1.7174  | 5.8016   | 11.38554 |
| C | -2.21947 | 9.65787  | 11.3037  |
| H | -1.15647 | 9.60714  | 9.4177   |
| C | -2.71336 | 8.91247  | 12.37499 |
| H | -2.92213 | 6.94211  | 13.24834 |
| H | -2.36197 | 10.74804 | 11.28074 |
| H | -3.24466 | 9.41539  | 13.19602 |
| C | 18.4565  | 4.7133   | 12.5258  |

E(SCF) = -4595.20449791 a.u.

E(zp) = -4593.295437 a.u.

# 3g

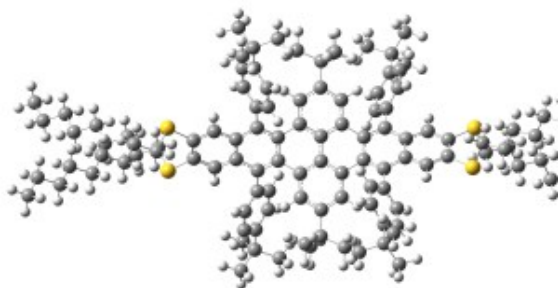

Optimized structure

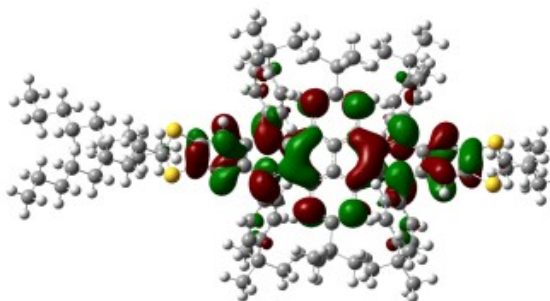

LUMO = -1.63 eV

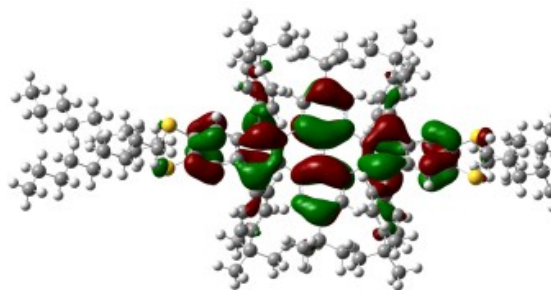

HOMO = -5.14 eV

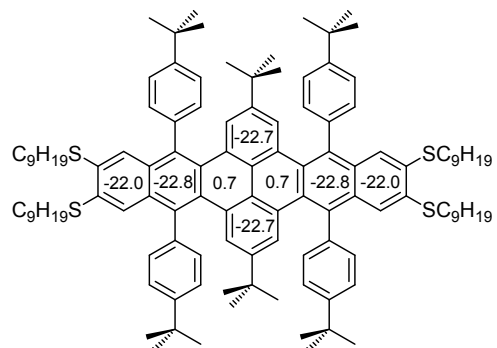

NICS(1)zz

|   |          |          |          |
|---|----------|----------|----------|
| C | -7.44314 | -1.2831  | -1.50252 |
| C | -6.2272  | -1.92777 | -1.44798 |
| H | -6.21692 | -3.00303 | -1.56681 |
| C | -4.99959 | -1.23871 | -1.22974 |
| C | -5.03887 | 0.19246  | -1.21589 |
| C | -6.30923 | 0.83663  | -1.20953 |
| H | -6.32624 | 1.91236  | -1.12151 |
| C | -3.8106  | 0.92465  | -1.26578 |
| C | -2.59373 | 0.22736  | -1.1974  |
| C | -2.59313 | -1.16546 | -0.8098  |
| C | -3.76758 | -1.91803 | -0.97755 |
| C | -3.76948 | -3.41384 | -0.99317 |
| C | -4.55116 | -4.18271 | -0.11991 |
| H | -5.1388  | -3.68691 | 0.6475   |
| C | -4.58716 | -5.57579 | -0.21394 |
| H | -5.20733 | -6.12055 | 0.48853  |
| C | -3.85298 | -6.26467 | -1.18905 |
| C | -3.0656  | -5.4874  | -2.05588 |
| H | -2.48    | -5.97104 | -2.83203 |
| C | -3.0202  | -4.10025 | -1.9619  |
| H | -2.40667 | -3.53336 | -2.6554  |
| C | -4.49238 | -8.13783 | -2.73843 |
| H | -4.5348  | -9.22398 | -2.87794 |
| H | -3.88996 | -7.72036 | -3.55064 |
| H | -5.50818 | -7.74216 | -2.83949 |
| C | -3.8994  | -7.79468 | -1.35056 |
| C | -4.77009 | -8.46964 | -0.27396 |
| H | -4.76744 | -9.55388 | -0.42467 |
| H | -5.81128 | -8.13442 | -0.32067 |
| H | -4.39246 | -8.27543 | 0.73533  |
| C | -2.47008 | -8.3773  | -1.24828 |
| H | -2.02436 | -8.15528 | -0.27344 |
| H | -1.80706 | -7.9727  | -2.01833 |
| H | -2.49527 | -9.46578 | -1.37155 |
| C | -3.87809 | 2.41879  | -1.30565 |

|   |          |          |          |
|---|----------|----------|----------|
| C | -3.34065 | 3.17665  | -0.25327 |
| H | -2.84275 | 2.66633  | 0.5656   |
| C | -3.44135 | 4.56437  | -0.24169 |
| H | -3.01606 | 5.10607  | 0.59812  |
| C | -4.08168 | 5.27043  | -1.27482 |
| C | -4.61575 | 4.50947  | -2.32401 |
| H | -5.11655 | 4.99687  | -3.1526  |
| C | -4.51927 | 3.11632  | -2.33898 |
| H | -4.94279 | 2.56337  | -3.17252 |
| C | -4.18432 | 6.80511  | -1.21234 |
| C | -2.76699 | 7.41854  | -1.12106 |
| H | -2.16834 | 7.15564  | -1.99922 |
| H | -2.22836 | 7.07259  | -0.23416 |
| H | -2.82871 | 8.51121  | -1.06706 |
| C | -4.99764 | 7.21026  | 0.04036  |
| H | -5.07404 | 8.30118  | 0.10987  |
| H | -4.53104 | 6.84913  | 0.96158  |
| H | -6.01241 | 6.80098  | -0.00252 |
| C | -4.88282 | 7.39549  | -2.45159 |
| H | -4.34414 | 7.1573   | -3.37452 |
| H | -4.92544 | 8.48603  | -2.36622 |
| H | -5.91113 | 7.03334  | -2.55214 |
| C | -1.36681 | -1.67139 | -0.15025 |
| C | -0.15433 | -0.9426  | -0.27101 |
| C | 0.99582  | -1.32691 | 0.45686  |
| C | 0.92941  | -2.48142 | 1.25439  |
| H | 1.82388  | -2.81589 | 1.75408  |
| C | -0.25175 | -3.20641 | 1.41028  |
| C | -1.38822 | -2.76957 | 0.71907  |
| H | -2.31798 | -3.29611 | 0.86991  |
| C | -0.34922 | -4.44472 | 2.32323  |
| C | -1.34861 | -4.15175 | 3.46789  |
| H | -1.01445 | -3.29981 | 4.06909  |
| H | -1.43652 | -5.02189 | 4.12865  |
| H | -2.34771 | -3.92148 | 3.08618  |
| C | 1.00488  | -4.81955 | 2.95321  |

|   |          |          |          |
|---|----------|----------|----------|
| H | 1.75437  | -5.05922 | 2.19144  |
| H | 0.88156  | -5.7072  | 3.58269  |
| H | 1.40377  | -4.01881 | 3.58263  |
| C | -0.84803 | -5.65933 | 1.50654  |
| H | -0.15372 | -5.89291 | 0.69272  |
| H | -1.83216 | -5.48409 | 1.06548  |
| H | -0.92294 | -6.5423  | 2.15216  |
| C | 7.26984  | 0.1728   | -0.29135 |
| C | 6.17682  | 0.23063  | -1.13155 |
| C | 4.83603  | 0.10359  | -0.66451 |
| C | 4.63892  | -0.23815 | 0.71183  |
| C | 5.77027  | -0.19442 | 1.57694  |
| H | 5.62384  | -0.33125 | 2.64007  |
| C | 3.3423   | -0.64065 | 1.15811  |
| C | 2.26678  | -0.59578 | 0.25582  |
| C | 2.41303  | 0.12389  | -0.98945 |
| C | 3.70269  | 0.33636  | -1.50547 |
| C | 3.95258  | 0.7148   | -2.93085 |
| C | 4.65563  | 1.87233  | -3.29238 |
| H | 4.98519  | 2.56041  | -2.5192  |
| C | 4.9419   | 2.15931  | -4.62878 |
| H | 5.4896   | 3.06789  | -4.85061 |
| C | 4.54863  | 1.30044  | -5.66421 |
| C | 3.83854  | 0.14505  | -5.29425 |
| H | 3.51287  | -0.5552  | -6.05794 |
| C | 3.54508  | -0.14276 | -3.96499 |
| H | 3.00303  | -1.05063 | -3.71799 |
| C | 5.77057  | 0.41889  | -7.67801 |
| H | 6.01407  | 0.58473  | -8.73353 |
| H | 5.27483  | -0.55306 | -7.59876 |
| H | 6.70925  | 0.36162  | -7.11746 |
| C | 4.87685  | 1.56427  | -7.14485 |
| C | 5.62673  | 2.89429  | -7.34881 |
| H | 5.83118  | 3.0424   | -8.41401 |
| H | 6.58782  | 2.9053   | -6.82474 |
| H | 5.03839  | 3.75078  | -7.00364 |

|   |          |          |          |
|---|----------|----------|----------|
| C | 3.56857  | 1.6165   | -7.96865 |
| H | 2.91661  | 2.42356  | -7.61966 |
| H | 3.00629  | 0.6807   | -7.90133 |
| H | 3.79324  | 1.79374  | -9.0264  |
| C | 3.1586   | -1.01272 | 2.59443  |
| C | 2.25882  | -0.28803 | 3.39332  |
| H | 1.68273  | 0.51559  | 2.94492  |
| C | 2.09834  | -0.58132 | 4.74308  |
| H | 1.39473  | 0.01174  | 5.31993  |
| C | 2.82401  | -1.60975 | 5.36975  |
| C | 3.72066  | -2.32947 | 4.56861  |
| H | 4.30844  | -3.13446 | 4.99414  |
| C | 3.88677  | -2.03788 | 3.21291  |
| H | 4.5876   | -2.62485 | 2.62663  |
| C | 2.62171  | -1.89568 | 6.86854  |
| C | 1.14017  | -2.25631 | 7.13004  |
| H | 0.85081  | -3.15328 | 6.57274  |
| H | 0.46536  | -1.44765 | 6.83479  |
| H | 0.97787  | -2.45222 | 8.19595  |
| C | 2.99289  | -0.63508 | 7.68574  |
| H | 2.84851  | -0.81908 | 8.75632  |
| H | 2.37618  | 0.22523  | 7.40971  |
| H | 4.04043  | -0.35993 | 7.5261   |
| C | 3.49477  | -3.06385 | 7.36378  |
| H | 3.26553  | -3.99551 | 6.83633  |
| H | 3.31194  | -3.23455 | 8.42951  |
| H | 4.56262  | -2.85527 | 7.24208  |
| C | 1.17355  | 0.6858   | -1.57824 |
| C | -0.08992 | 0.19584  | -1.15265 |
| C | -1.28839 | 0.80458  | -1.595   |
| C | -1.19948 | 1.86623  | -2.51056 |
| H | -2.11072 | 2.28538  | -2.90416 |
| C | 0.02575  | 2.38295  | -2.9319  |
| C | 1.19414  | 1.79283  | -2.43594 |
| H | 2.14631  | 2.2134   | -2.72039 |
| C | 0.13253  | 3.58011  | -3.89733 |

|   |          |          |          |
|---|----------|----------|----------|
| C | 0.82752  | 4.75633  | -3.17068 |
| H | 0.24728  | 5.07281  | -2.29765 |
| H | 0.92611  | 5.6154   | -3.84435 |
| H | 1.83057  | 4.48677  | -2.8271  |
| C | -1.24374 | 4.06618  | -4.3873  |
| H | -1.78132 | 3.28347  | -4.93302 |
| H | -1.11024 | 4.91063  | -5.07176 |
| H | -1.87866 | 4.40358  | -3.56324 |
| C | 0.96643  | 3.17944  | -5.13637 |
| H | 0.49666  | 2.34622  | -5.66916 |
| H | 1.98117  | 2.87496  | -4.86934 |
| H | 1.042    | 4.02592  | -5.82909 |
| C | -7.49416 | 0.13958  | -1.33584 |
| C | 7.05419  | 0.01735  | 1.11785  |
| H | 6.35342  | 0.3724   | -2.18936 |
| C | 8.88933  | 1.76734  | 2.37099  |
| C | 9.98698  | 1.96377  | 3.41829  |
| H | 9.24269  | 2.04906  | 1.37567  |
| H | 8.00645  | 2.36546  | 2.61654  |
| C | 10.44425 | 3.4264   | 3.51394  |
| H | 9.6231   | 1.62906  | 4.39835  |
| H | 10.84617 | 1.32721  | 3.17049  |
| H | 10.81489 | 3.7569   | 2.53379  |
| H | 9.57875  | 4.06373  | 3.74325  |
| C | 9.56962  | -1.34597 | -0.87808 |
| C | 10.96042 | -1.42294 | -1.51056 |
| H | 9.60906  | -1.60629 | 0.18281  |
| H | 8.87542  | -2.02415 | -1.3837  |
| C | 11.55339 | -2.83623 | -1.42078 |
| H | 10.90527 | -1.11335 | -2.56228 |
| H | 11.62961 | -0.71145 | -1.00985 |
| H | 11.60921 | -3.13916 | -0.36604 |
| H | 10.8704  | -3.5476  | -1.90588 |
| C | 12.94354 | -2.95696 | -2.05812 |
| C | 13.53284 | -4.36949 | -1.96313 |
| H | 13.62756 | -2.2438  | -1.5768  |



|   |          |          |          |
|---|----------|----------|----------|
| H | 12.88648 | -2.65681 | -3.11402 |
| C | 14.91799 | -4.50467 | -2.60767 |
| H | 13.59399 | -4.66558 | -0.90618 |
| H | 12.84259 | -5.0823  | -2.4365  |
| C | 15.50374 | -5.91815 | -2.50709 |
| H | 14.85633 | -4.21198 | -3.66561 |
| H | 15.60895 | -3.79093 | -2.13671 |
| H | 15.56821 | -6.20993 | -1.44893 |
| H | 14.81108 | -6.63257 | -2.97488 |
| C | 16.88675 | -6.05978 | -3.15482 |
| C | 17.46266 | -7.47489 | -3.04785 |
| H | 17.57936 | -5.34631 | -2.6879  |
| H | 16.82192 | -5.76994 | -4.21244 |
| H | 18.44996 | -7.543   | -3.51621 |
| H | 17.56945 | -7.78088 | -2.00085 |
| H | 16.81073 | -8.20629 | -3.53907 |
| C | 11.53217 | 3.65059  | 4.57178  |
| C | 11.99212 | 5.10991  | 4.6754   |
| H | 12.3973  | 3.01188  | 4.34417  |
| H | 11.15914 | 3.31714  | 5.55056  |
| C | 13.06936 | 5.3385   | 5.74281  |
| H | 12.37263 | 5.441    | 3.69862  |
| H | 11.12447 | 5.74878  | 4.89367  |
| C | 13.52875 | 6.7977   | 5.84848  |
| H | 12.68767 | 5.00694  | 6.71909  |
| H | 13.93727 | 4.69961  | 5.5255   |
| H | 13.91544 | 7.12889  | 4.87392  |
| H | 12.66025 | 7.43758  | 6.06127  |
| C | 14.60011 | 7.02877  | 6.92128  |
| C | 15.05295 | 8.48859  | 7.01952  |
| H | 15.46793 | 6.38955  | 6.70912  |
| H | 14.21302 | 6.69904  | 7.89507  |
| H | 15.81557 | 8.62135  | 7.79387  |
| H | 15.47845 | 8.83606  | 6.07115  |
| H | 14.21264 | 9.14838  | 7.26405  |
| S | 8.89754  | 0.3699   | -1.02366 |

|   |           |          |          |
|---|-----------|----------|----------|
| S | 8.38216   | -0.00951 | 2.32486  |
| S | -9.09653  | 0.91468  | -1.3357  |
| S | -8.90876  | -2.23965 | -1.82709 |
| C | -9.78839  | -1.5308  | -3.20266 |
| C | -11.12993 | -2.1972  | -3.36904 |
| H | -9.1681   | -1.65985 | -4.12246 |
| H | -9.91282  | -0.43668 | -3.01601 |
| H | -10.98333 | -3.29839 | -3.529   |
| H | -11.72615 | -2.07868 | -2.42556 |
| C | -11.9189  | -1.60698 | -4.55258 |
| C | -13.28702 | -2.23349 | -4.63762 |
| H | -11.34139 | -1.79416 | -5.49008 |
| H | -12.00005 | -0.5026  | -4.40701 |
| H | -13.18286 | -3.34459 | -4.75714 |
| H | -13.83986 | -2.05668 | -3.67701 |
| C | -14.10436 | -1.66507 | -5.81255 |
| C | -15.47897 | -2.28228 | -5.84454 |
| H | -13.55472 | -1.87909 | -6.76099 |
| H | -14.17317 | -0.55693 | -5.69122 |
| H | -15.38649 | -3.39671 | -5.94031 |
| H | -16.00337 | -2.07828 | -4.87343 |
| C | -16.32459 | -1.73522 | -7.00954 |
| C | -17.69777 | -2.35635 | -6.99999 |
| H | -15.79615 | -1.96332 | -7.96671 |
| H | -16.39383 | -0.62542 | -6.90473 |
| C | -18.55274 | -1.84178 | -8.12945 |
| H | -17.60426 | -3.47196 | -7.07969 |
| H | -18.20044 | -2.13783 | -6.02058 |
| H | -19.56321 | -2.31603 | -8.10087 |
| H | -18.68014 | -0.73474 | -8.05374 |
| H | -18.0823  | -2.0726  | -9.11581 |
| C | -10.29942 | -0.20766 | -0.65613 |
| C | -11.44473 | 0.55654  | -0.04314 |
| H | -9.79496  | -0.84333 | 0.11128  |
| H | -10.66405 | -0.87296 | -1.4758  |
| H | -11.05351 | 1.23722  | 0.75893  |

|   |           |          |          |
|---|-----------|----------|----------|
| H | -11.92031 | 1.2078   | -0.82374 |
| C | -12.50567 | -0.38564 | 0.55544  |
| C | -13.63647 | 0.40932  | 1.15612  |
| H | -12.01536 | -1.02114 | 1.3321   |
| H | -12.88218 | -1.05422 | -0.25615 |
| H | -13.23305 | 1.09252  | 1.94996  |
| H | -14.09758 | 1.05966  | 0.36612  |
| C | -14.7171  | -0.50348 | 1.76492  |
| C | -15.84719 | 0.3209   | 2.32598  |
| H | -14.24577 | -1.1223  | 2.56639  |
| H | -15.08947 | -1.19041 | 0.96685  |
| H | -15.44748 | 1.02164  | 3.10629  |
| H | -16.28896 | 0.95385  | 1.51119  |
| C | -16.9473  | -0.56202 | 2.94387  |
| C | -18.07981 | 0.29011  | 3.45651  |
| H | -16.4966  | -1.15833 | 3.77377  |
| H | -17.31128 | -1.27146 | 2.16179  |
| C | -19.1754  | -0.5443  | 4.06879  |
| H | -17.68804 | 1.01253  | 4.22091  |
| H | -18.50058 | 0.89984  | 2.61339  |
| H | -20.00134 | 0.10871  | 4.44051  |
| H | -19.59754 | -1.25321 | 3.31596  |
| H | -18.78272 | -1.14021 | 4.92797  |

E(SCF)=-6106.29033918 a.u.

E(zp)=-6103.871624 a.u.
