# Supplementary material for: Facile and versatile access to substituted hexabenzoovalene derivatives: characterization and optoelectronic properties
Source: Royal Society of Chemistry journal article supplement (doi:10.1039/c9ob01446b), 2019-01-01
Supplement: c9ob01446b3.pdf [file c9ob01446b3.pdf]

HOMO and LUMO distribution and NICS values of **SHBO**. The *tert*-butyl group is simplified to methyl unit.

| <b>SHBO-a</b>                                                                       | <b>SHBO-c</b>                                                                        |
|-------------------------------------------------------------------------------------|--------------------------------------------------------------------------------------|
| 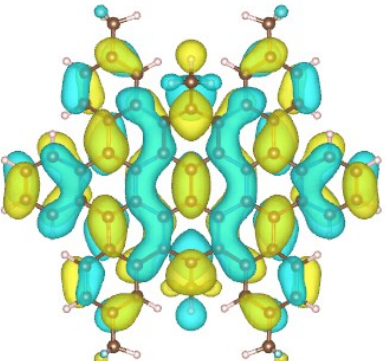   |    |
| LUMO = -2.082 eV                                                                    | LUMO = -1.958 eV                                                                     |
|   |   |
| HOMO = -4.586 eV                                                                    | HOMO = -4.486 eV                                                                     |
|  |  |
| NICS(1)zz                                                                           | NICS(1)zz                                                                            |

# SHBO-i

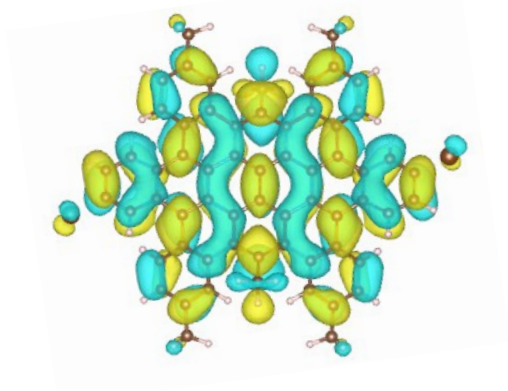

LUMO = -2.284 eV

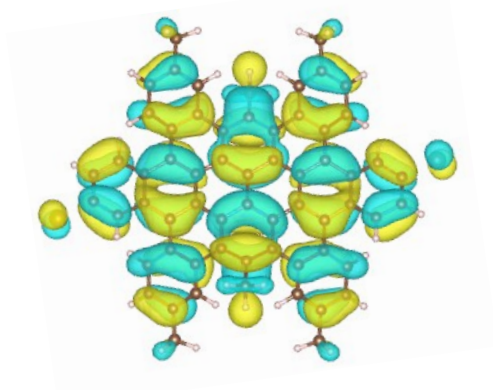

HOMO = -4.779 eV

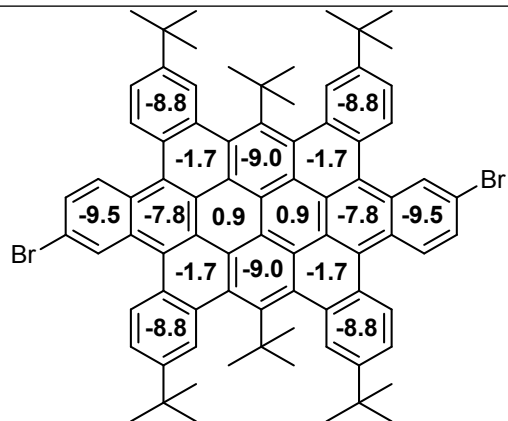

NICS(1)<sub>zz</sub>
